1 **Bioengineering multifunctional extracellular vesicles**  
2 **for targeted delivery of biologics to T cells**  
3

4 Devin M. Stranford<sup>1,2</sup>, Lacy M. Simons<sup>3,4</sup>, Katherine E. Berman<sup>2,5</sup>, Luyi Cheng<sup>2,5</sup>, Julius B.  
5 Lucks<sup>1,2,5,6</sup>, Judd F. Hultquist<sup>3,4</sup>, Joshua N. Leonard<sup>1,2,5,6,7\*</sup>  
6

- 7 1. Department of Chemical and Biological Engineering, Northwestern University, Evanston,  
8 IL, 60208, USA  
9 2. Center for Synthetic Biology, Northwestern University, Evanston, IL, 60208, USA  
10 3. Department of Medicine, Division of Infectious Diseases, Northwestern University  
11 Feinberg School of Medicine, Chicago, IL, 60611, USA  
12 4. Center for Pathogen Genomics and Microbial Evolution, Northwestern University Havey  
13 Institute for Global Health, Chicago, IL, 60611, USA  
14 5. Interdisciplinary Biological Sciences Training Program, Northwestern University,  
15 Evanston, IL, 60208, USA  
16 6. Chemistry of Life Processes Institute, Northwestern University, Evanston, IL, 60208, USA  
17 7. Member, Robert H. Lurie Comprehensive Cancer Center, Northwestern University,  
18 Evanston, IL, 60208, USA

19  
20 \*Correspondence and requests for materials should be directed to: [j-leonard@northwestern.edu](mailto:j-leonard@northwestern.edu)  
21

## 22 Abstract

23  
24 Genetically modifying T cells can enable applications ranging from cancer immunotherapy to HIV  
25 treatment, yet delivery of T cell-targeted therapeutics remains challenging. Extracellular vesicles  
26 (EVs) are nanoscale particles secreted by all cells that naturally encapsulate and transfer proteins  
27 and nucleic acids, making them an attractive and clinically-relevant platform for engineering  
28 biocompatible delivery vehicles. We report a suite of technologies for genetically engineering cells  
29 to produce multifunctional EV vehicles—without employing chemical modifications that  
30 complicate biomanufacturing. We display high affinity targeting domains on the EV surface to  
31 achieve specific, efficient binding to T cells, identify a protein tag to confer active cargo loading  
32 into EVs, and display fusogenic glycoproteins to increase EV uptake and fusion with recipient  
33 cells. We demonstrate integration of these technologies by delivering Cas9-sgRNA complexes to  
34 edit primary human T cells. These approaches could enable targeting vesicles to a range of cells  
35 for the efficient delivery of cargo.

## 36 Main text

37  
38  
39 CRISPR-Cas9 mediated genome engineering of human T cells is an area of active investigation  
40 for the development of therapeutics to treat cancer, autoimmunity, and infectious disease.<sup>1</sup>  
41 Delivery of the programmable nuclease Cas9 with a single guide RNA (sgRNA) complementary  
42 to a target sequence results in the introduction of double-stranded breaks that can introduce  
43 frameshift mutations in coding genes and the ablation of protein expression. Alternately, co-  
44 delivery of a homology-directed repair template can insert specified mutations, insertions, or  
45 deletions into the genomes of target cells. While this technology has multiple applications,  
46 translation of this strategy remains difficult due to the challenges associated with *in vivo* delivery  
47 of Cas9. One approach that leverages foundational gene therapy advances is adeno-associated  
48 virus (AAV) vehicles, although safety and efficacy are often limited by anti-vector immunity and  
49 limited tissue tropism.<sup>2-6</sup> Virus-like particles (VLPs) can also deliver Cas9 nucleases or base  
50 editors,<sup>7-9</sup> although it remains unclear whether the immunogenicity of viral proteins will likewise  
51 limit these approaches.<sup>10</sup> Synthetic nanoparticle-nucleic acid (e.g., mRNA) delivery is an  
52 alternative to viral vectors and has been successfully used for *in vivo* delivery of mRNA to confer  
53 sustained expression of chimeric antigen receptors in murine T cells.<sup>11</sup> However, achieving  
54 efficient and specific T cell targeting in a manner that confers the transient expression of Cas9  
55 needed to avoid off-target effects remains challenging.<sup>12,13</sup> These general difficulties are uniquely  
56 compounded by the challenge of delivering any cargo to T cells, which exhibit low rates of  
57 endocytosis.<sup>14</sup> Altogether, there exists substantial opportunity to improve delivery systems that  
58 could enable delivery of biologics to T cells inside a patient.

59  
60 A promising emerging strategy is the use of extracellular vesicles (EVs) to deliver biomolecular  
61 cargo. EVs are nanoscale, membrane-enclosed particles secreted by all cells and naturally  
62 encapsulate proteins and nucleic acids during biogenesis. EVs mediate intercellular  
63 communication, delivering their contents to recipient cells to affect cellular function.<sup>15,16</sup> Intrinsic  
64 properties such as non-toxicity and non-immunogenicity,<sup>17,18</sup> as well as the ability to engineer  
65 surface and luminal cargo loading, make EVs an attractive platform for delivering a wide range of  
66 therapeutics. Cargo can be incorporated into vesicles either by overexpressing the cargo in the  
67 producer cells such that it is loaded during EV biogenesis or by physically or chemically modifying  
68 vesicles post-harvest.<sup>17,19</sup> Cells that are genetically engineered to produce functionalized EVs  
69 may even be implanted to continuously generate such particles *in situ*.<sup>20</sup> While modification of  
70 EVs post-harvest may confer cargo loading flexibility, this approach requires more extensive  
71 purification and introduces challenges from a manufacturing and regulatory standpoint.

72  
73 Several recent studies have investigated the use of EVs to deliver Cas9 for treatment of cancer,  
74 hepatitis B, and genetic diseases, highlighting the promise of this method for achieving  
75 intracellular Cas9 delivery.<sup>21-23</sup> However, many exploratory studies have employed EV  
76 engineering methods known to introduce artifacts in downstream experiments, which obscures  
77 how functional effects may be attributable to EVs. Of particular concern are methods that rely on  
78 transfecting EV producer cells with lipoplexes, loading EVs with electroporation methods known  
79 to result in cargo aggregation, or isolating EVs with commercial kits not intended for functional  
80 delivery applications, which have all been shown to introduce artifacts.<sup>24-26</sup>

81  
82 Here, we address this need by developing an integrated bioengineering strategy for genetically  
83 engineering cells to direct the self-assembly and production of multifunctional EVs. As a  
84 motivating application, we systematically evaluate, compare, and generate techniques  
85 enabling EV targeting, active loading of protein cargo into EVs, and EV fusion to achieve  
86 functional cargo delivery to T cells. This exploration identifies key limitations and drivers of  
87 functional EV-mediated delivery, including a potential mechanism of receptor binding-  
88 mediated delivery enhancement to T cells. We validate these technologies by demonstrating a  
89 therapeutically relevant capability—delivering Cas9 ribonucleoprotein complex (RNP) to ablate  
90 the gene encoding the HIV co-receptor CXCR4<sup>27,28</sup> in primary human CD4<sup>+</sup> T cells.

## 91 92 **RESULTS**

93  
94 **Strategy for engineering multifunctional EVs for achieving delivery to T cells.** Our overall  
95 approach for developing technologies toward the goal of enabling targeted delivery of  
96 biomolecules to T cells is to address each limiting step in the process (**Fig. 1**)—cargo loading into  
97 EVs during biogenesis, binding of EVs to specific target cells, uptake, and fusion of the EV with a  
98 recipient cell to release cargo into the cytoplasm. Our approach relies entirely upon genetically-  
99 encodable functions, and we term this strategy GEMINI—Genetically Encoded Multifunctional  
100 *Integrated Nanovesicles*.  
101

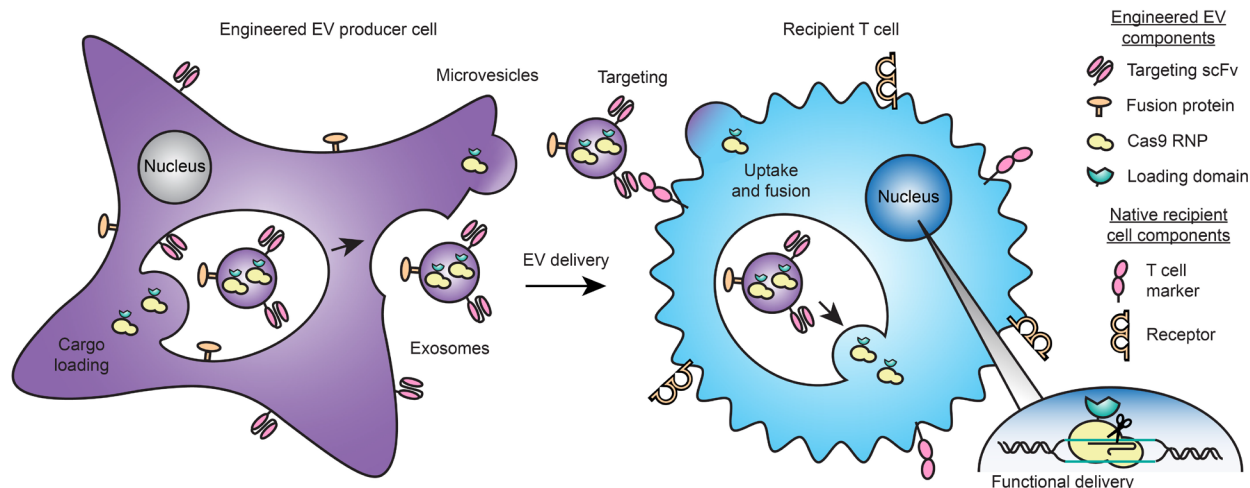

102  
103  
104  
105  
106  
107  
108  
109  
110  
111  
112  
113

**Fig. 1: Overview of the GEMINI strategy for genetically engineering multifunctional EVs.**

EV cargo proteins are expressed in producer cells to facilitate incorporation into multiple vesicle populations: microvesicles, which bud from the cell surface, or exosomes, which are produced by endosomal invaginations into multivesicular bodies. Surface-displayed targeting and fusion proteins aid in binding to and uptake by recipient cells and subsequent cargo release via cell surface fusion or endosomal escape. In the proof-of-principle application explored in this study, the objective is to deliver a Cas9-sgRNA complex to T cells in order to knock out a gene, as described in subsequent sections.

114 **Engineered membrane scaffolds display scFvs on EVs.** We first investigated strategies for conferring EV targeting. Displaying targeting moieties on the EV surface is one method to promote specific interactions between EVs and target cells and facilitate EV uptake. This strategy was pioneered using display of small peptides,<sup>17,19</sup> although we and others have demonstrated that these effects are modest and variable.<sup>29</sup> Recently, display of high affinity targeting domains, including nanobodies and antibody single chain variable fragments (scFvs), conferred EV targeting to receptors such as EGFR and HER2.<sup>30-32</sup> We investigated whether this approach could mediate EV targeting to T cells using an anti-CD2 scFv.<sup>33</sup> We selected CD2 as ligand engagement triggers internalization,<sup>34</sup> and we hypothesized that such a mechanism could enhance EV uptake upon receptor docking. This could be of particular utility for conferring delivery to T cells, which exhibit low rates of endocytosis and for which delivery of other vehicles is generally challenging.<sup>14</sup> We also chose to avoid targets such as CD3 which could induce non-specific T cell activation. We selected a distinct display system based upon the platelet-derived growth factor receptor (PDGFR) transmembrane domain;<sup>19,29</sup> we hypothesized that using this general strategy may confer display of targeting domains on multiple EV populations. Since extravesicular linker design may impact scFv trafficking, folding, and target binding, we investigated three candidates: an  $\alpha$ -helix to provide structure,<sup>33</sup> a 40 residue glycine-serine sequence to provide flexibility, or the hinge region of IgG4 used in chimeric antigen receptors to display scFvs on synthetic receptors.<sup>35</sup> All three constructs were expressed at comparable levels in HEK293FT cells (**Supplementary Fig. 1a, b**). To test display on EVs, two vesicle populations were isolated using a previously validated differential centrifugation method.<sup>36,37</sup> EVs are best defined by the separation method used for their isolation;<sup>26</sup> for convenience, hereafter the fraction isolated at 15,000 x g is termed "microvesicles" (MV) and the fraction isolated at 120,416 x g is termed "exosomes" (exo). Vesicles were enriched in canonical markers such as CD9, CD81, and Alix and depleted in the endoplasmic reticulum protein calnexin (**Supplementary Fig. 2a**). Both populations comprised

134  
135  
136  
137  
138

139 vesicles averaging ~120-140 nm in diameter and exhibited the expected “cup shaped”  
140 morphology (**Supplementary Fig. 2b, c**). Importantly, all three scFv display constructs were  
141 substantially expressed in both vesicle populations (**Supplementary Fig. 1c**).

142  
143 **Display of anti-CD2 scFvs enhances EV binding to Jurkat T cells.** To evaluate targeting, we  
144 harvested vesicles from HEK293FT producer cells stably expressing our scFv constructs and a  
145 cytosolic dTomato fluorescent protein. EVs were incubated with Jurkat T cells, which express high  
146 levels of CD2 (**Supplementary Fig. 3**), for 2 h, and then cells were washed to removed unbound  
147 vesicles (**Supplementary Fig. 4**) and analyzed by flow cytometry. All three constructs enhanced  
148 both microvesicle and exosome binding to T cells (**Fig. 2a–c**). Display of scFvs on microvesicles  
149 enhanced delivery of dTomato to T cells more so than did display on exosomes, though some—  
150 but not all—of this effect is attributable to greater dTomato incorporation in microvesicles vs  
151 exosomes (**Supplementary Fig. 5a, b**). Since the helical linker consistently conferred the  
152 greatest targeting effect, this design was carried forward for subsequent work.

153  
154 **CD2-scFv binding mediates uptake by recipient cells.** We next evaluated whether CD2  
155 engagement by EVs triggers internalization (as noted, ligand binding naturally triggers CD2  
156 internalization<sup>34</sup>). To distinguish EV binding from uptake, cells were treated with trypsin after  
157 incubation with EVs to remove non-internalized vesicles. Cells receiving targeted vesicles  
158 displayed a modest increase in fluorescence over the non-targeted control (**Fig. 2d**), indicating  
159 that CD2 targeting can mediate EV uptake.

160  
161 **CD2-scFv-mediated EV targeting is specific.** To determine whether the observed vesicle and  
162 T cell interactions resulted from specific receptor binding, we pre-incubated recipient Jurkat cells  
163 with an antibody binding the same T11<sub>1</sub> epitope on CD2 as does our scFv to block potential  
164 binding sites. Antibody pre-treatment ablated scFv-enhanced EV binding (**Fig. 2e**), demonstrating  
165 that our targeting is specific for CD2. In contrast, pre-incubation with non-targeted EVs (a potential  
166 non-specific competitor) did not substantially reduce either background or scFv-enhanced binding  
167 (**Supplementary Fig. 6**). Together, these data indicate that the scFv mediates specific binding of  
168 EVs to CD2.

169  
170 **Optimization of scFv expression increases targeting.** Increasing the avidity of interactions  
171 between binders (e.g., targeted therapeutics) and their receptors is a generally useful strategy for  
172 enhancing delivery and function *in vivo*.<sup>38</sup> To potentially capitalize upon this mechanism, we  
173 sought to increase the expression of our scFv constructs and therefore loading into vesicles  
174 through mass action. By optimizing the coding sequence of our scFv display construct for  
175 expression in human cells using a sliding window algorithm,<sup>39</sup> we enhanced cellular expression  
176 of our scFv (**Supplementary Fig. 7a, b**) and increased scFv loading onto vesicles without  
177 affecting vesicle size or morphology (**Supplementary Fig. 7c–e**). EVs generated from cells stably  
178 expressing optimized scFv constructs exhibited enhanced specific binding to target cells (**Fig. 2f**).  
179 At the end of this limited optimization, targeted EV binding to CD2<sup>+</sup> Jurkat T cells exceeded a 100-  
180 fold increase over non-targeted EVs. This optimized targeting system also conferred enhanced  
181 EV binding and modest EV internalization in primary human CD4<sup>+</sup> T cells (**Fig. 2g, h**), which  
182 express high levels of CD2 (**Supplementary Fig. 8**) and was carried forward for the rest of this  
183 study.

184  
185 **CD2-scFv display scaffold influences loading and specificity.** Previous reports have  
186 achieved scFv display on EVs by fusion to the C1C2 lactadherin domain, which binds to  
187 phosphatidylserine on the outer membrane leaflet of some vesicles.<sup>30,31,40</sup> To compare our  
188 PDGFR-based display strategy to other state-of-the-art EV scFv display systems, we fused our  
189 optimized anti-CD2 scFv to the C1C2 lactadherin domain scaffold (**Supplementary Fig.**

190 **9a)**.<sup>30,31,40</sup> We observed similar expression of both constructs in cells, but higher loading of C1C2  
191 scFv constructs (as compared to PDGFR constructs) into vesicles (**Supplementary Fig. 9b, c**).  
192 Both systems conferred similar microvesicle binding to Jurkat cells (**Supplementary Fig. 9d**).  
193 C1C2 display appeared to confer some enhancement in exosome binding to T cells (compared  
194 to PDGFR display), but C1C2 display targeting was uneven, with only a subset of Jurkat recipient  
195 cells bound strongly to C1C2 display EVs, whereas PDGFR display targeting generally mediates  
196 delivery to the entire population of T cells (**Supplementary Fig. 9e**). Since this pattern might  
197 provide evidence of CD2-independent EV binding (which would comprise an artifact), we  
198 investigated whether C1C2 display targeting was specific. Pre-incubation of EVs with an anti-CD2  
199 antibody mediated only a partial reduction in C1C2 display targeted EV binding (in contrast to  
200 PDGFR display targeting), suggesting the existence of substantial non-target-specific  
201 mechanisms for C1C2 display targeting of EVs using this scFv (**Supplementary Fig. 9f, g**). Given  
202 these observations, we opted to proceed with the validated and efficient PDGFR display of scFvs  
203 to achieve EV targeting.  
204



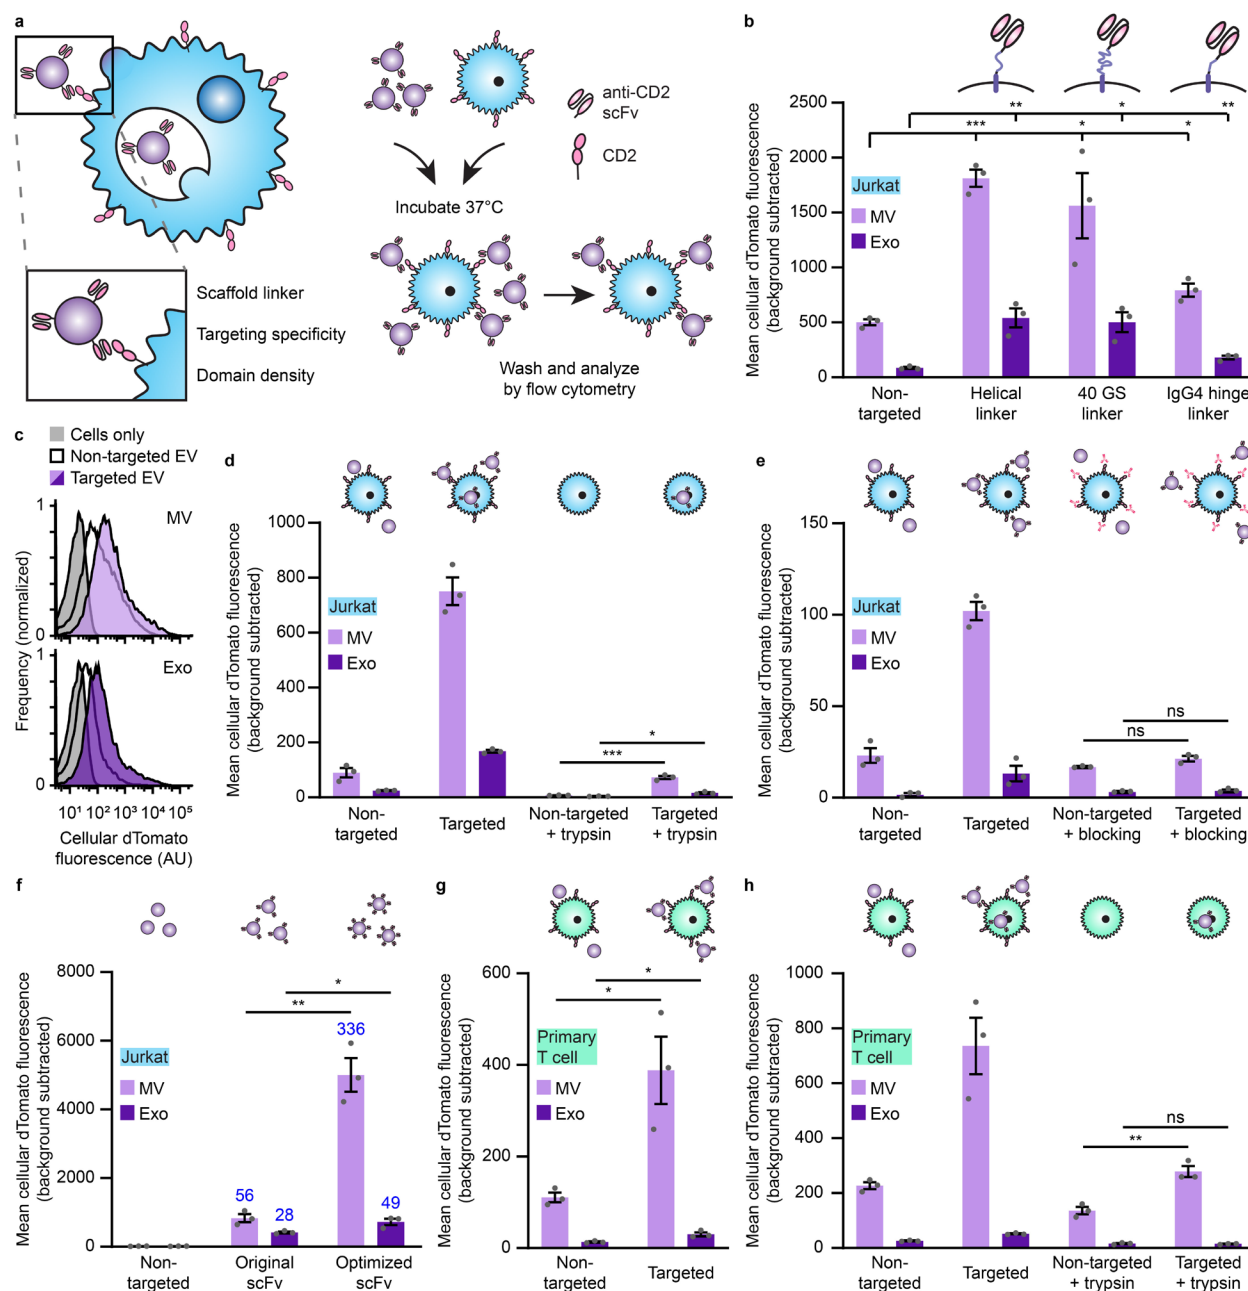

205  
206  
207  
208  
209  
210  
211  
212  
213  
214  
215  
216  
217  
218

**Fig. 2: Display of scFvs on EVs mediates specific, targeted binding and uptake to T cells.**  
**a**, Strategy for targeting EVs to T cells (left) and illustration of EV binding experiments (right). **b**,  
Targeted EVs binding to Jurkats (2 h incubation). To evaluate potential differences in dTomato  
loading, average EV fluorescence was analyzed separately (**Supplementary Fig. 5**). **c**,  
Representative histograms depicting distributions of helical linker EV-mediated fluorescence in  
recipient cells analyzed in **b**. **d**, Distinguishing binding and internalization for EVs targeted to  
Jurkats. Trypsinization was used to remove bound, non-internalized EVs following a 6 h  
incubation. **e**, Specificity of EV targeting to CD2. Pre-incubation with anti-CD2 antibodies ablated  
EV targeting to Jurkats. **f**, Enhancement of targeting by codon-optimized expression of scFv  
constructs. Fold increases over the non-targeted control are reported in blue. **g**, Binding of  
targeted EVs to primary human CD4<sup>+</sup> T cells (2 h incubation). **h**, Distinguishing binding and  
internalization for EVs targeted to primary human CD4<sup>+</sup> T cells. All experiments were performed

219 in biological triplicate, and error bars indicate standard error of the mean. Statistical tests comprise  
220 two-tailed Student's t-tests using the Benjamini-Hochberg method to reduce the false discovery  
221 rate. (\*p < 0.05, \*\*p < 0.01, \*\*\*p < 0.001). Exact p-values are reported in **Supplementary Table**  
222 **1**. EV dTomato loading evaluations are in **Supplementary Fig. 5**.

223  
224

### 225 **Abscisic acid-inducible dimerization domains enable an active EV cargo loading system.**

226 We next sought to engineer our scFv-containing EVs to load a therapeutic cargo of interest.  
227 Overexpression of cytosolic cargo in EV producer cells results in passive loading into vesicles  
228 during biogenesis via mass action.<sup>41</sup> Increasing cargo content in EVs would potentially produce a  
229 more potent delivery vehicle. In order to both enhance cargo protein loading and increase the  
230 likelihood that a given vesicle will incorporate both a cytosolic cargo protein and our membrane-  
231 bound scFv, we designed a small molecule dimerization-based loading system (**Fig. 3a**). Systems  
232 using light or small molecules (e.g., rapamycin) as inducers have been reported to aid EV cargo  
233 loading,<sup>42,43</sup> but light is difficult to scale to large volumes and rapamycin-induced dimerization is  
234 so tight that it is functionally irreversible.<sup>44</sup> Therefore, we explored a new strategy based upon the  
235 plant hormone abscisic acid (ABA)-inducible interaction between truncated versions of the  
236 abscisic acid insensitive 1 (ABI) and pyrabactin resistance-like (PYL) proteins.<sup>45</sup> This "ABA"  
237 system confers several advantages: association is rapid; the dimerization is reversible,  
238 presumably allowing for cargo release in recipient cells; ABA is inexpensive and non-toxic; and  
239 small molecule-regulated loading is more readily applicable to biomanufacturing than is control  
240 by light. We first investigated fusing the ABI and PYL domains to the luminal side of our scFv  
241 construct and to either the 5' or 3' end of a cytosolic or nuclear-localized EYFP cargo protein to  
242 determine effects on protein expression and function. Fusion with the PYL domain reduced  
243 expression (or destabilized) EYFP (**Supplementary Fig. 10a**), while the scFv was tolerant to  
244 fusions with either ABI or PYL domains (**Supplementary Fig. 10b, c**). Thus, we moved forward  
245 with the scFv-PYL and EYFP-ABI (3' fusion) constructs. ABA-induced dimerization of ABI and  
246 PYL in this setup was readily evident by microscopy (**Fig 3b** and **Supplementary Fig. 11**).

247

248 **The ABI domain alone drives protein incorporation into EVs.** To investigate cargo protein  
249 loading, vesicles were adsorbed to latex beads and analyzed by flow cytometry. Surprisingly, no  
250 increase in EV loading was observed with ABA treatment, and across all conditions, constructs  
251 containing the ABI domain demonstrated a higher degree of loading than did those lacking this  
252 domain (**Fig 3c, d**). This effect was not attributable to ABI-dependent increases of protein  
253 expression in producer cells (**Supplementary Fig. 12a**). ABI-enhanced loading was evident when  
254 paired with the scFv alone or the scFv-PYL construct, indicating that intrinsic ABI-enhanced  
255 loading is independent of ABI-PYL interactions (**Fig. 3c**). The presence of the scFv conferred an  
256 added benefit in protein loading over an EYFP-ABI only control, for unknown reasons  
257 (**Supplementary Fig. 12b**). In order to investigate the role of subcellular localization on the EV  
258 loading process, we introduced a nuclear localization sequence (NLS) to EYFP-ABI and  
259 compared loading to the purely cytosolic construct. ABA-induced dimerization again had a  
260 negligible effect on cargo loading, and addition of an NLS to EYFP-ABI did not diminish loading  
261 into EVs (**Supplementary Fig. 12c**). Altogether, these data support the serendipitous discovery  
262 that ABI comprises a novel, potent EV cargo protein loading tag.

263

264 **The ABI domain mediates Cas9 loading into EVs.** We next investigated whether ABI can be  
265 used to load EVs with functional cargo. For this, we selected *S. pyogenes* Cas9, as Cas9 can be  
266 synthesized in producer cells (and is thus consistent with the GEMINI strategy) and because Cas9  
267 must travel to the nucleus of recipient cells to act on genomic targets. ABI was fused to the N- or  
268 C-terminus of Cas9, and, in general, expression patterns matched those observed for EYFP with  
269 improved expression of C-terminally tagged Cas9 (**Supplementary Fig. 13a**). Thus, we moved



270 forward with the Cas9-ABI (3' fusion) constructs. We also investigated whether addition of an NLS  
271 or ABI domain impacted Cas9 function. When expressed via transfection (along with a cognate  
272 sgRNA targeting a reporter construct) in reporter Jurkat T cells, Cas9 fusion constructs exhibited  
273 similar nuclease activity to Cas9 alone (**Supplementary Fig. 13b, c**). When Cas9 constructs were  
274 expressed in EV producer cells, the NLS minimally influenced Cas9 loading into EVs, while the  
275 ABI domain noticeably increased Cas9 loading (**Fig. 3e** and **Supplementary Fig. 13d**) but not  
276 overall expression in producer cells (**Supplementary Fig. 13e**). These trends are consistent with  
277 those observed with EYFP and demonstrate the utility of the ABI loading tag across multiple cargo  
278 proteins.

279  
280 **Membrane scFvs and ABI-fused Cas9 co-load into EVs.** An important, but largely unexplored,  
281 factor to consider in engineering EV-based therapeutics is the extent to which multiple cargo types  
282 localize to the same vesicles in a population. Although ABI (alone) successfully loads protein into  
283 EVs, it remained unknown whether dimerization of cargo and display proteins could enhance co-  
284 loading into EVs (i.e., co-loading of both the scFv and Cas9 into individual vesicles). To evaluate  
285 this question, we generated vesicles from cells expressing scFv-PYL and Cas9-ABI treated with  
286 ABA or a vehicle control and isolated anti-CD2 scFv-displaying vesicles via the 3x FLAG tag  
287 located on the N-terminus of the scFvs by affinity chromatography (**Supplementary Fig. 14a**).<sup>46</sup>  
288 High levels of Cas9 were found in scFv-enriched vesicles, independent of ABA treatment,  
289 indicating that ABI-tagging of cargo is sufficient to achieve substantial scFv and Cas9 co-  
290 localization in EVs (**Fig. 3f** and **Supplementary Fig. 14b**).

291  
292 **EV-loaded Cas9 exhibits nuclease function.** To evaluate whether EV-encapsulated Cas9  
293 RNPs are functional, we devised a direct *in vitro* assay. EVs from Cas9 and sgRNA-expressing  
294 cells were lysed and incubated with a plasmid encoding the sgRNA target sequence (**Fig. 3g**).  
295 Plasmids treated with lysed RNP-containing EVs showed the expected specific cleavage products  
296 under all conditions tested. The presence or absence of an NLS did not impact cleavage efficiency  
297 in this assay, but Cas9 fused to the ABI domain exhibited some reduced cleavage for both vesicle  
298 populations. Since it is not clear whether this partial effect (e.g., a potential reduction in Cas9  
299 turnover rate) is meaningful in a cellular delivery context (further consideration in **Discussion**),  
300 both ABI+ and ABI- constructs were evaluated in subsequent experiments.

301

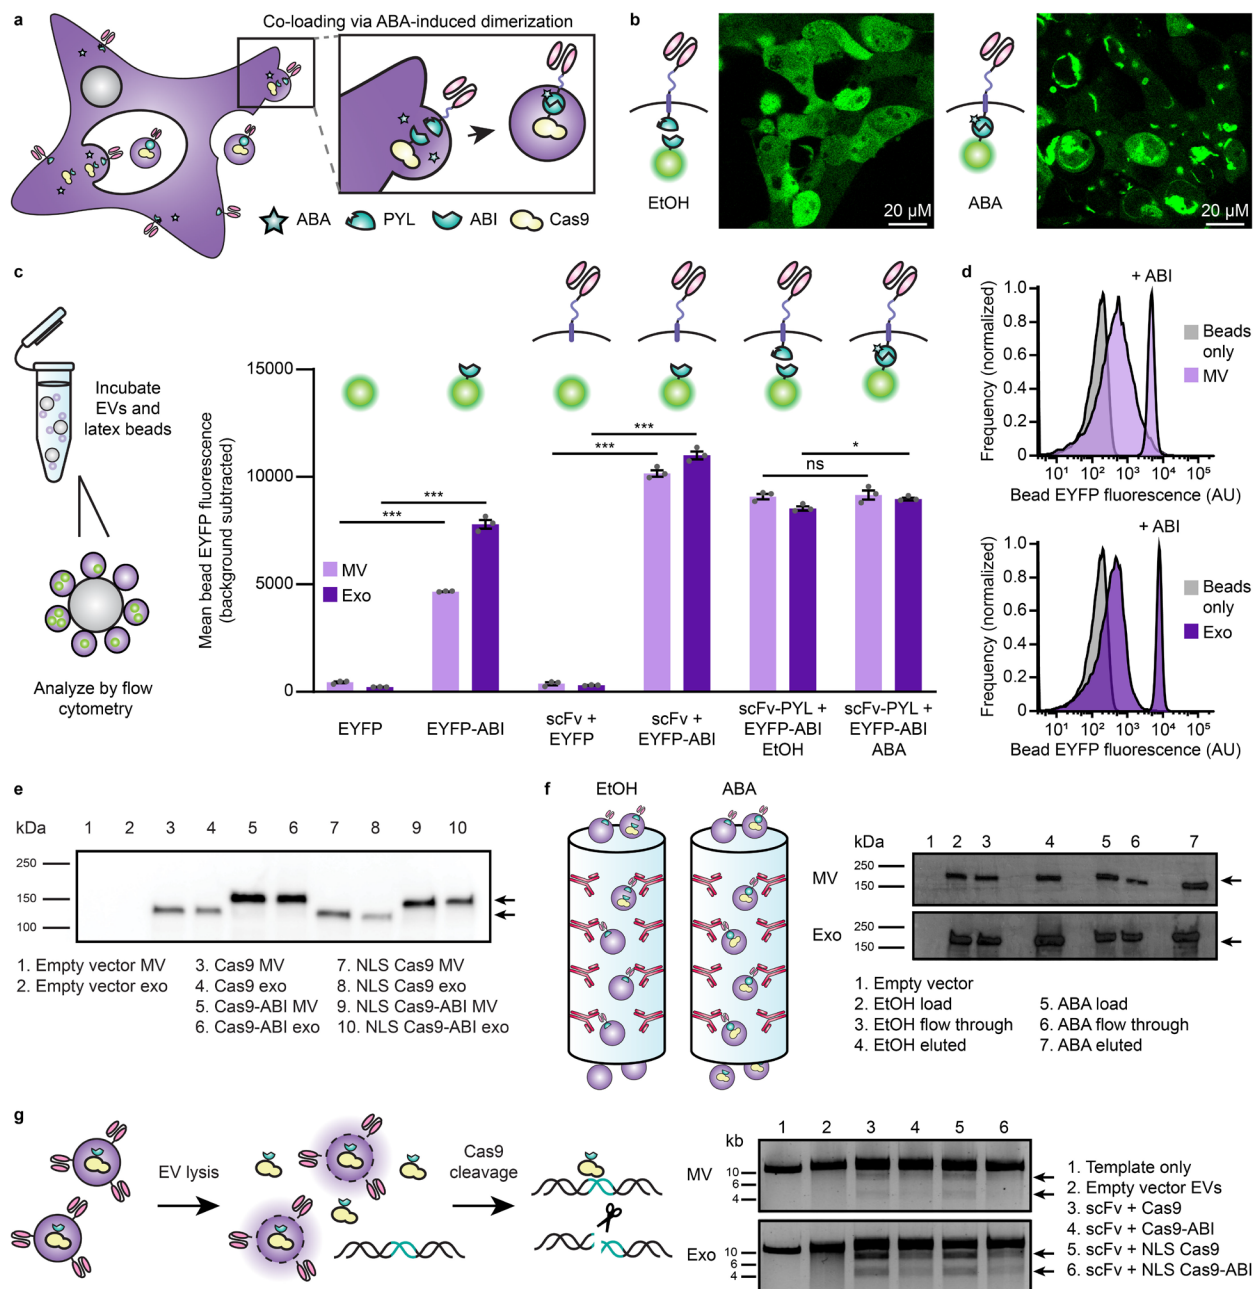

302  
303  
304  
305  
306  
307  
308  
309  
310  
311  
312  
313  
314  
315

**Fig. 3: Cargo protein is actively loaded into EVs via tagging with the ABI domain of the abscisic acid dimerization system.** **a**, Illustration of abscisic acid-based dimerization of EV cargo proteins and subsequent loading into vesicles. **b**, ABA-induced dimerization between PYL and ABI domains. Illustrative microscopy showing anti-CD2 scFv-PYL (membrane bound) and EYFP-ABI (cytosolic) association in the presence of ABA. Full images are in **Supplementary Fig. 11**. **c**, ABA-induced cargo loading into EVs. EVs generated under conditions indicated were adsorbed to aldehyde/sulfate latex beads and analyzed by flow cytometry to determine bulk average fluorescence. Experiments were performed in biological triplicate, and error bars indicate standard error of the mean. Statistical tests comprise two-tailed Student's t tests using the Benjamini-Hochberg method to reduce the false discovery rate. (\* $p < 0.05$ , \*\* $p < 0.01$ , \*\*\* $p < 0.001$ ). Exact p-values are reported in **Supplementary Table 1**. **d**, Representative histograms of EYFP +/- ABA conditions in **c**. **e**, Active loading of Cas9-ABI with and without an NLS into EVs.

316  $6.0 \times 10^8$  EVs were loaded per lane. Expected band sizes (~160 or 195 kDa, arrows) correspond  
317 to Cas9 +/- the ABI domain. The full blot is provided in **Supplementary Fig. 13d, f**, Analysis of  
318 ABA-dependent Cas9-ABI loading into EVs enriched for anti-CD2 scFv-PYL via affinity  
319 chromatography.  $1.3 \times 10^7$  MVs or  $2.0 \times 10^7$  exos were loaded per lane. Expected band size: 195  
320 kDa (arrows). Full blots are provided in **Supplementary Fig. 14b, g**, Bioactivity of EV-associated  
321 Cas9. Vesicles were lysed and incubated with a linearized target plasmid for 1 h at 37°C in Cas9  
322 nuclease reaction buffer. Expected cut band sizes: 7.6 and 4.6 kb (arrows).

323  
324

325 **Viral glycoprotein display increases EV uptake by T cells.** To promote EV uptake and fusion,  
326 we investigated displaying viral glycoproteins on EVs. We first investigated vesicular stomatitis  
327 glycoprotein (VSV-G), which is commonly used in lentiviral pseudotyping and has been reported  
328 to confer EV fusion with recipient cells.<sup>47,48</sup> VSV-G was transiently expressed in dTomato-  
329 expressing producer cells, and the resulting EVs were incubated with recipient T cells for 16 h  
330 prior to trypsinization (to remove non-internalized vesicles) and analysis by flow cytometry. VSV-  
331 G enhanced EV uptake in both Jurkat T cells (**Fig. 4a, b**) and primary human CD4<sup>+</sup> T cells (**Fig.**  
332 **4c**), establishing the utility in of viral fusion proteins for delivering EVs to T cells.

333

334 To develop an EV fusion system that is more specific to T cells (since VSV-G mediates fusion to  
335 most cell types),<sup>49</sup> we investigated the use of truncated versions of the measles virus  
336 glycoproteins H and F, which have previously been used to aid lentiviral delivery to T cells.<sup>50,51</sup>  
337 These proteins bind signaling lymphocyte activation molecule F1 (SLAM) and/or the complement  
338 regulator CD46, both of which are expressed on diverse T cells.<sup>52</sup> H/F proteins are classically  
339 believed to mediate viral fusion at the cell surface,<sup>53</sup> although it has also been reported that viral  
340 endocytosis can be mediated by SLAM.<sup>51,54</sup> In the same fluorescent EV uptake assay described  
341 above, we investigated EV delivery to Jurkats (which minimally express SLAM), SLAM-transgenic  
342 Jurkats, or primary human T cells that express SLAM (**Fig. 4d**). H/F proteins conferred modest  
343 EV uptake to parental Jurkats (SLAM-), but these proteins substantially enhanced EV uptake by  
344 SLAM-transgenic Jurkats and primary human CD4<sup>+</sup> T cells (**Fig. 4e, f**). We also explored an  
345 alternative, non-viral protein-based strategy reported to promote functional transfer by  
346 overexpressing constitutively active Cx43, a connexin protein involved in the formation of gap  
347 junctions, on EV producer cells.<sup>20,55</sup> Cx43 did not confer increased EV internalization by T cells in  
348 this application, so this approach was not further investigated (**Supplementary Fig. 16**).  
349 Altogether, these results support the use of the measles H/F glycoproteins as a method for  
350 enhancing EV uptake by SLAM<sup>+</sup> T cells.

351

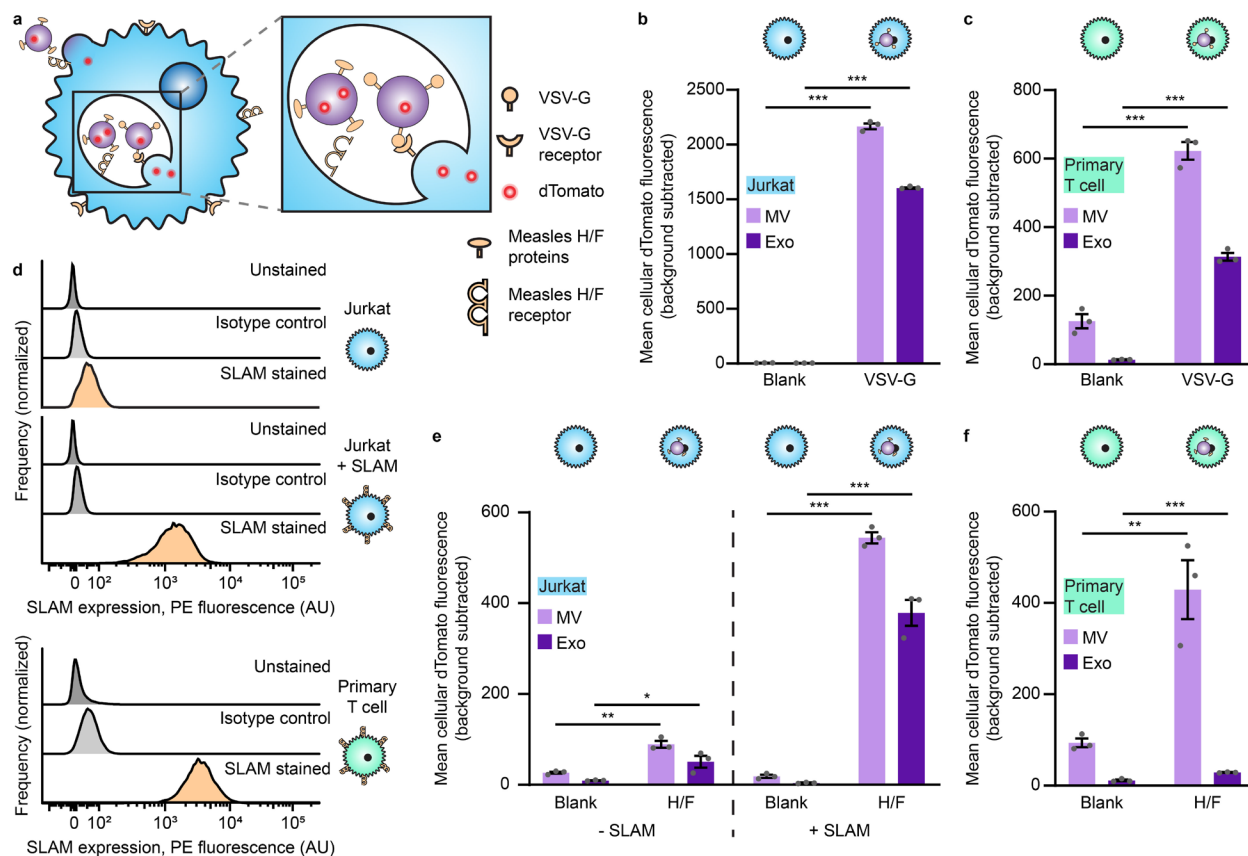

352

353

354

355

356

357

358

359

360

361

362

363

364

365

366

367

**Fig. 4: Viral glycoprotein display on EVs mediates uptake by recipient T cells.** **a**, Illustration of viral glycoproteins facilitating EV uptake and fusion at either the plasma membrane or in the endosome. **b**, Uptake of dTomato-labeled VSV-G EVs by Jurkat T cells. **c**, Uptake of dTomato-labeled VSV-G EVs by primary human CD4<sup>+</sup> T cells. **d**, Surface expression of SLAM on T cells. Unmodified Jurkats, Jurkats expressing transgenic SLAM, or primary human CD4<sup>+</sup> T cells were evaluated for SLAM surface expression by flow cytometry. **e**, Uptake of dTomato-labeled measles viral glycoproteins H/F EVs by Jurkats (+/- SLAM). **f**, Uptake of dTomato-labeled measles virus glycoproteins H/F EVs by primary human CD4<sup>+</sup> T cells. In all cases, EVs were incubated with cells for 16 h and trypsinized to remove surface-bound vesicles. Experiments were performed in biological triplicate, and error bars indicate standard error of the mean. Statistical tests comprise two-tailed Student's t tests using the Benjamini-Hochberg method to reduce the false discovery rate. (\*p < 0.05, \*\*p < 0.01, \*\*\*p < 0.001). Exact p-values are shown in **Supplementary Table 1**. EV dTomato loading evaluations are in **Supplementary Fig. 15**.

368 **EVs mediate functional delivery of Cas9 to primary T cells.** Evaluating functional delivery of  
369 Cas9 to recipient T cells requires effective cargo loading, T cell binding and fusion, and  
370 subsequent release of active Cas9 RNPs, and having validated each of these steps individually,  
371 we proceeded to evaluate the combined technologies—the first combined test of the GEMINI  
372 strategy. Specifically, we investigated the use of Cas9 to target the CXCR4 locus in primary T  
373 cells using a previously validated sgRNA; CXCR4 is a clinically-relevant target for the treatment  
374 of HIV.<sup>56-58</sup> Since viral glycoprotein expression is cytotoxic, at this point we pivoted to  
375 biomanufacturing EVs using a Lenti-X HEK293T cell line that is well-suited to this challenge; this  
376 line was selected for its ability to produce high lentiviral titers. EVs containing the anti-CD2 scFv,  
377 NLS Cas9-ABI with the appropriate sgRNA, and either VSV-G or measles virus glycoproteins H/  
378 F were incubated with primary human CD4<sup>+</sup> T cells for 6 d before harvesting genomic DNA for  
379 high throughput sequencing (HTS) to quantify and characterize targeted edits in a region of 64  
380 nucleotides centered around the expected cleavage site. Excitingly, indels were identified at the  
381 predicted Cas9 cut site for all vesicle treatments containing Cas9 RNPs (**Fig. 5** and  
382 **Supplementary Fig. 17**). VSV-G display on EVs conferred higher editing efficiencies than did  
383 measles H and F proteins, and exosome treatments conferred more edits than did microvesicle  
384 treatments for matched designs. The majority of edits were classified as deletions with a smaller  
385 number of insertion events or edits consisting of both an insertion and a deletion. This overall  
386 pattern is consistent with prior reports of Cas9 RNP editing at this locus,<sup>56</sup> in that edits comprise  
387 mostly small deletions and insertions centered around the cleavage locus, indicating that EV-  
388 mediated delivery of Cas9 using GEMINI yields effects that are qualitatively comparable to  
389 electroporation of recombinant Cas9 RNPs. In order to evaluate the role of ABI-mediated active  
390 loading in functional delivery, we generated EVs with Cas9 +/- ABI and evaluated editing  
391 efficiencies in primary T cells. The two Cas9 variants performed comparably well in this context,  
392 despite previously noted tradeoffs in loading and specific cleavage activity (**Supplementary Fig.**  
393 **18**).  
394  
395  
396



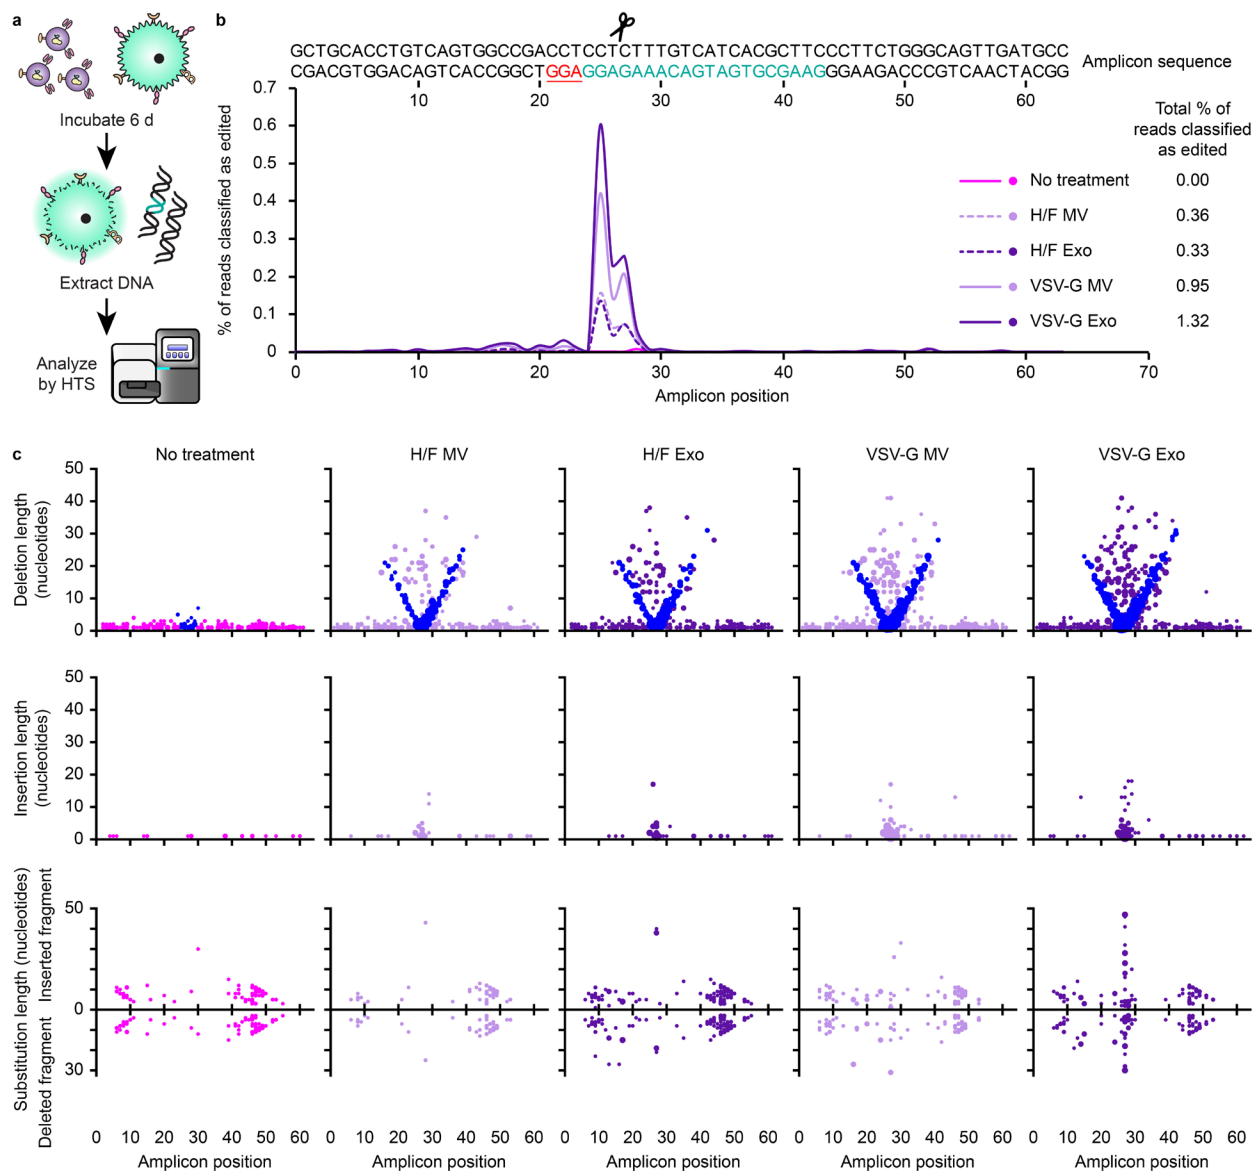

397  
 398  
 399 **Fig. 5: EVs mediate functional delivery of Cas9 in primary human T cells.** **a**, Illustration of  
 400 function delivery evaluation.  $2.0 \times 10^{10}$  EVs were incubated with  $5.0 \times 10^4$  CD4<sup>+</sup> T cells for 6 d prior  
 401 to genomic DNA extraction and HTS analysis. **b**, Frequency of indels detected at the Cas9-  
 402 targeted CXCR4 locus. The sgRNA recognition site (green), PAM sequence (underlined, red),  
 403 and predicted cut site (amplicon position 26, scissors) are shown. Total percentage of HTS reads  
 404 classified as “edited” represents the area under the histogram trace shown for each sample. **c**,  
 405 Distributions of EV-Cas9-mediated edits, by type. DNA amplicon position is plotted on the  
 406 abscissa and length of the edit observed is plotted on the ordinate, while the size of each dot  
 407 scales with the number of edits that meet that description. Each read is uniquely classified as a  
 408 deletion, insertion, or substitution such that no one read contributes to more than one dot in this  
 409 panel. In the case of substitutions, the positive ordinate reports the insertion portion of the edit,  
 410 and the negative ordinate reports the deletion portion of the edit such that each edit is represented  
 411 by two dots. In this panel, deletions are reported by placing a dot at the midpoint of the deleted  
 412 segment. To help explain the apparent “V” pattern, dots are colored blue to indicate cases where

413 one end of the deleted segment corresponds to the predicted cut region, presumably  
414 corresponding to a subset of the DNA repair outcomes observed. Sample dot coloring is as in **b**.

415  
416

417 Having achieved functional delivery with our multifunctional EVs, this enabled us to next  
418 interrogate the specific contributions of each engineered EV feature. In particular, we sought to  
419 evaluate the unique contribution of the anti-CD2 scFv, since it can confer some degree of binding  
420 and uptake *in vitro*. To ascertain the requirement of EV scFv-CD2 engagement for functional  
421 delivery, we pretreated and cultured cells with an anti-CD2 antibody prior to EV addition to block  
422 receptors on recipient cells. Surprisingly, we found that pretreatment with the anti-CD2 antibody  
423 increased editing rates across vesicle types and viral glycoprotein systems (**Fig. 6a, b**). To explain  
424 this observation, we hypothesized that engagement of CD2 might result in higher levels of T cell  
425 activation, making cells more susceptible to EV uptake and editing; this would be a novel  
426 consequence of CD2 engagement if confirmed. To investigate this possibility, we incubated T  
427 cells with either EV scFvs or anti-CD2 antibodies and analyzed surface expression of CD25 2 d  
428 post-treatment. CD25 expression was minimally impacted by any treatment, indicating that T cell  
429 activation cannot explain the observed increase in editing upon CD2 engagement  
430 (**Supplementary Fig. 19**). To investigate how editing efficiency scales with practical  
431 considerations such as EV dose, and to probe how CD2 engagement may contribute to this  
432 process, we evaluated EV delivery to T cells from two distinct donors using only a single EV dose  
433 or repeating EV administration every day for the 6 d incubation (**Fig. 6c, d**). As expected, repeat  
434 EV administration increased editing efficiency in all cases, indicating that redosing is a useful  
435 handle for boosting editing. In general, scFv-CD2 engagement enhanced editing mediated by  
436 exosomes, although this effect was not evident for microvesicle-mediated editing. Finally, in order  
437 to evaluate which trends hold across experiments, we performed a combined analysis  
438 (normalizing to control for variables hypothesized to contribute to variation in editing efficiency,  
439 such as donor T cell batch-specific susceptibility to Cas9 RNP-mediated editing<sup>57</sup>) (**Fig. 6e, f**).  
440 Overall, these combined trends support the key conclusions noted above.

441

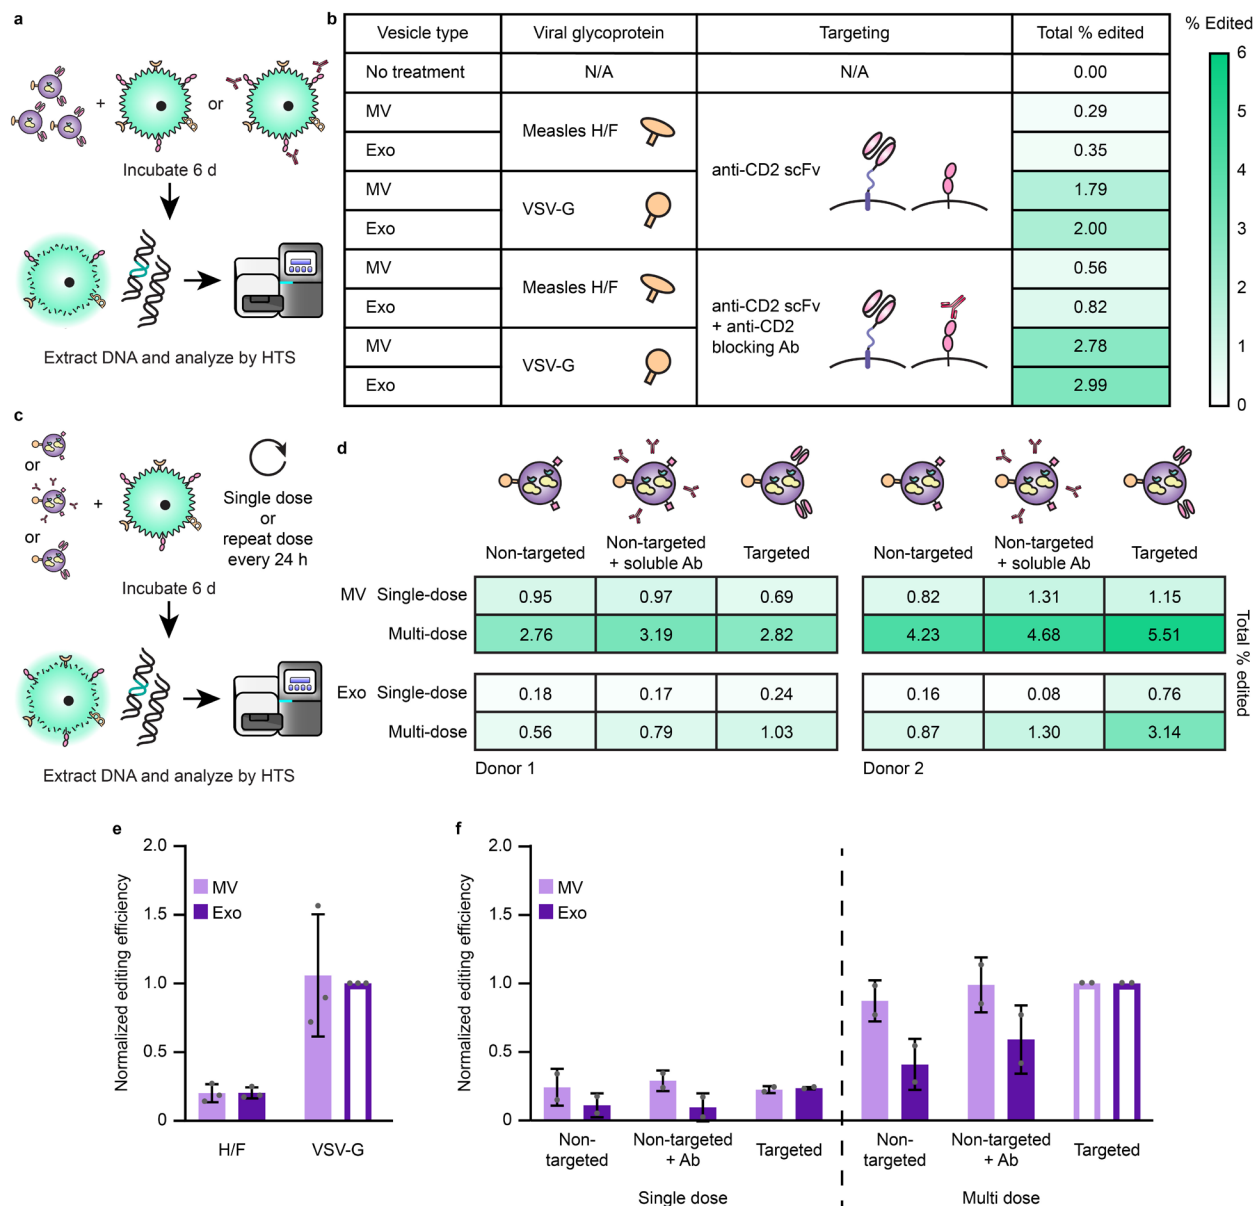

442  
443  
444  
445  
446  
447  
448  
449  
450  
451  
452  
453  
454  
455  
456  
457

**Fig. 6: CD2 engagement and repeat dosing enhance EV-mediated functional cargo delivery and vary with vesicle subpopulation.** **a**, Illustration of strategy for probing the requirement of scFv-CD2 engagement by blocking CD2. **b**, Blocking CD2 on recipient cells prior to EV addition increases total editing for all vesicle types.  $8.0 \times 10^9$  EVs were incubated per  $4.0 \times 10^4$  CD4<sup>+</sup> T cells for 6 d prior to genomic DNA extraction and HTS analysis. Heat map coloring scales from 0-6% total Cas9-mediated editing. **c,d**, Illustration (**c**) and evaluation (**d**) of experiments probing Cas9-mediated editing after repeat EV administration and various modes of CD2 engagement. Two independent experiments using different donor cells and EV preparations are shown. EV dosing was: Donor 1— $1.25 \times 10^{10}$  MVs or  $5.50 \times 10^9$  exos per  $5 \times 10^4$  cells; Donor 2— $1.50 \times 10^{10}$  MVs or  $7.50 \times 10^9$  exos per  $5 \times 10^4$  cells. Heat map coloring is as in **b**. **e**, EV-mediated Cas9 functional delivery shows consistent trends across 3 donors and EV batches. Editing efficiency was normalized to the sample receiving VSV-G exosomes (open bar) for each of three independent experiments. **f**, Combined analysis of experiments presented in **d**. Within each vesicle population, editing efficiencies were normalized to the sample receiving multiple doses of VSV-G EVs (open

458 bars); this normalization strategy is designed to control for expected sources of greatest variation  
459 (i.e., intrinsic donor/T cell batch-specific susceptibility to EVs and editing). Error bars represent  
460 one standard deviation.

461

462

463

464

## DISCUSSION

In this study, we developed the GEMINI strategy of combining genetically-encoded, general platform approaches for targeting EVs to recipient cells with surface-displayed scFvs, actively loading EVs with protein cargo via tagging with vesicle-localizing domains, and promoting uptake and fusion with recipient cells by displaying viral glycoproteins. The motivating application of achieving Cas9 delivery to T cells—a challenging objective—proved useful for refining and validating technologies that can be combined to achieve this goal.

An exciting aspect of EV-mediated delivery is the potential to target vesicles to cells and receptors of interest through engineered interactions. Prior reports have demonstrated non-targeted EV-mediated transfer to T cells, with cargo including EV-encapsulated AAV8<sup>59</sup> or zinc finger-fused methyltransferases.<sup>60</sup> EVs that bind T cells have also been described as a method of crosslinking T cells and other cellular targets by displaying linked anti-CD3 and anti-EGFR scFvs on the PDGFR transmembrane domain.<sup>61</sup> To our knowledge, this study is the first demonstrating integration of EV targeting and uptake by T cells. We anticipate that the modularity of our targeting construct will be useful for directing EVs to other cell types and receptors.

One technology reported here involved the serendipitous discovery that the ABI domain (from the ABA dimerization system) facilitates EV cytosolic cargo protein loading even without with ABA. The mechanism of this effect is unknown. ABI is not predicted by WoLF PSORT (<https://www.genscript.com/wolf-psort.html>) to localize to the cell membrane or endosomal pathways. An advantage of this system is that ABI-mediated loading is easier to implement than multi-domain dimerization systems (using light,<sup>42</sup> rapamycin,<sup>43</sup> or Dmr domains<sup>62</sup>) or tags that require overexpression of helper proteins to facilitate trafficking into vesicles, such as the WW domain and Ndfip1.<sup>63</sup> Other active loading tags have recently been explored by Codiak Biosciences,<sup>64</sup> in this case deriving a tag from a membrane-associating protein, though the reversibility of such interactions has yet to be established. Although increased Cas9 loading did not confer additional DNA cleavage in our *in vitro* assay, potentially because this particular Cas9 fusion strategy reduced Cas9 turnover rate (**Supplementary Fig. 13c**), higher cargo loading is likely beneficial in cell delivery contexts where EVs must overcome additional barriers of uptake, fusion, cytosolic release, and intracellular trafficking. In such contexts, the advantage of delivering more Cas9-sgRNA cargo may outweigh slower reaction rates. It is also possible that the ABI fusion strategy may be refined in future work to mitigate any effects on Cas9 activity.

The eventual fate of EVs in recipient cells is often degradation in the endosomal/lysosomal pathway,<sup>41</sup> and thus developing methods to achieve vesicle fusion in recipient cells is critical for achieving (or enhancing) functional cargo delivery (i.e., to the cytoplasm). Here, we demonstrated the use of VSV-G and measles virus glycoproteins H/F to achieve efficient internalization of EVs by both Jurkat and primary T cells for VSV-G and in cells expressing the lymphocyte receptor SLAM for H/F. An important translational consideration is that mutant versions of the H/F proteins have been developed to evade neutralizing host antibodies, such as those induced by the measles vaccine.<sup>65</sup> However, in functional Cas9 delivery studies, we observed greater Cas9 editing efficiencies in primary T cells treated with VSV-G vesicles as compared to H/F, likely because of increased fusion of VSV-G in acidic endosomal environments.<sup>66</sup> Our observed conversion efficiencies, although modest at the doses used in this exploration, meet or exceed comparable reports in the literature. Perhaps the most rigorous and compelling comparator study reported that 12 repeat, high-dose ( $\sim 1 \times 10^{11}$  EVs as compared to our  $\sim 1 \times 10^{10}$  EVs) administrations of vesicles derived from MDA-MB-231 breast cancer cells loaded with an sgRNA were required to achieve conversion efficiencies on the order of 0.1% in HEK293T reporter cells that constitutively express Cas9 (a cell type to which delivery of viral vectors and various biomolecules



516 is fairly efficient compared to T cells).<sup>67</sup> We observed substantially greater conversion rates in our  
517 system, and conversion increased with repeat administration for both EV types. In the specific  
518 HIV application contemplated, conversion of even a limited pool of T cells to resist HIV infection  
519 could confer therapeutic benefits.<sup>68</sup> EVs have been explored for potential utility in HIV treatment  
520 through approaches such as Cas9-mediated excision of proviruses in microglial cells,<sup>62</sup>  
521 repressing viral replication with zinc finger-fused methyltransferases,<sup>60</sup> or killing of infected cells  
522 using HIV Env-targeted vesicles,<sup>69</sup> but these preliminary demonstrations have not yet been  
523 developed into methods for achieving specific delivery and treatment of T cells using a clinically  
524 translatable approach. Another important finding is that while exact editing efficiencies varied  
525 across donors and EV doses (a pattern observed with Cas9 RNP delivery by other methods<sup>57</sup>),  
526 the overall trends we observed were highly conserved when controlling for these effects,  
527 demonstrating repeatability. These results are particularly exciting when noting that the quantified  
528 efficiencies are limited by Cas9-mediated cleavage and DNA repair rates, such that we are  
529 certainly underestimating the number of functional delivery events, and other cargo types and  
530 mechanisms might confer even greater rates of functional delivery.

531  
532 A surprising finding is that CD2 engagement, by either recombinant antibody or EV-displayed  
533 antibody, enhanced functional exosome-mediated delivery *in vitro*, though no comparable benefit  
534 for microvesicle-mediated delivery was observed. This combination of effects is not explained by  
535 known features of CD2/T cell biology, although it could be related to findings that ligand  
536 engagement triggers CD2 internalization<sup>34</sup>. While scFv-displaying vesicles of both types  
537 specifically bound CD2 and were internalized to some degree, there may exist a difference in  
538 intracellular trafficking and fusion between the two vesicle populations. For example, CD2-  
539 binding-mediated trafficking might favor fusion over native uptake pathways in a way that  
540 differentially favors exosomes. This phenomenon warrants further study to elucidate underlying  
541 mechanisms.

542  
543 A key feature of this study is the selection of methods that avoid artifacts found in EV studies.  
544 One general and often overlooked artifact with EV functional delivery experiments is the risk of  
545 transfer of residual producer cell transfection reagent; particles from cells transfected with  
546 lipoplexes can mediate functional effects erroneously attributed to EVs.<sup>24</sup> We minimized such  
547 risks by employing a transfection method that is unlikely to transfer plasmids to T cells. Key  
548 comparative observations (e.g., differences in functional delivery by viral glycoprotein choice)  
549 support our interpretation that we quantified true EV-mediated delivery.

550  
551 The technologies employed here are generalizable and amenable to large scale production and  
552 biomanufacturing. Our strategy of genetically programming the self-assembly of multifunctional  
553 particles avoids the need for post-harvest chemical modification that necessitates further  
554 purification, lower EV yields, and may incur regulatory challenges. Although we used transient  
555 transfections for some transgenes (e.g., viral glycoproteins that cannot be constitutively  
556 expressed due to toxicity), such genes are regularly expressed from inducible promoters for  
557 production of biologics.<sup>70,71</sup> We anticipate that the integrated tools developed here for EV  
558 targeting, cargo loading, and vesicle fusion will be widely applicable for a range of applications  
559 and targets, providing a flexible platform for engineering EV therapeutics.

560

561 **METHODS**

562

563 **Plasmid construction.** Plasmids were constructed using standard molecular biology techniques.  
564 Codon optimization was performed using the GeneArt gene synthesis tool (Thermo Fisher). PCR  
565 was performed using Phusion DNA polymerase (New England Biolabs, NEB), and plasmid  
566 assembly was performed via restriction enzyme cloning. Plasmids were transformed into TOP10  
567 competent *E. coli* (Thermo Fisher) and grown at 37°C.

568

569 **Plasmid backbones.** A modified pcDNA3.1 (Thermo Fisher V87020), was used to generate a  
570 general expression vector. Briefly, the hygromycin resistance gene and SV40 promoter were  
571 removed, leaving the SV40 origin of replication and poly(A) signal intact. The BsaI sites in the  
572 AmpR gene and 5'-UTR and the BpII site in the bGH poly(A) signal were mutated. The lentiviral  
573 vector pGIPZ (Open Biosystems) was obtained through the Northwestern High Throughput  
574 Analysis Laboratory. plentiCRISPRv2 was a gift from Feng Zhang<sup>72</sup> (Addgene plasmid No.  
575 52961).

576

577 **Plasmid source vectors.** Fluorescent proteins enhanced blue fluorescent protein 2 (EBFP2),  
578 enhanced yellow fluorescent protein (EYFP), and dimeric tomato (dTomato) were sourced from  
579 Addgene vectors (plasmid Nos. 14893, 58855, and 18917, respectively) gifted by Robert  
580 Campbell,<sup>73</sup> Joshua Leonard,<sup>74</sup> and Scott Sternson.<sup>75</sup> dsRedExpress2 was purchased from  
581 Clontech/Takara. Monomeric teal fluorescent protein 1 (TFP1) was synthesized by Thermo  
582 Fisher. psPAX2 and pMD2.G were gifts from William Miller. The anti-CD2 scFv was synthesized  
583 from a previously published scFv sequence derived from monoclonal antibody 9.6,<sup>33</sup> and the  
584 PDGFR transmembrane domain was sourced from a pDisplay system vector (Addgene plasmid  
585 No. 61556, gifted by Robert Campbell).<sup>76</sup> The C1C2 domain sequence was provided by Natalie  
586 Tighe<sup>30</sup> and synthesized by Thermo Fisher. Constitutively active Cx43 and SLAM were  
587 synthesized by Thermo Fisher from Uniprot sequences P17302 CXA1\_HUMAN and Q13291-1  
588 SLAF1\_HUMAN isoform 1, respectively. Plasmids encoding the measles virus glycoproteins were  
589 gifts from Isabelle Clerc, Thomas Hope, and Richard D'Aquila.<sup>50</sup> pX330 encoding Cas9 was gifted  
590 by Erik Sontheimer (UMass), originally sourced from Addgene plasmid No. 42230 gifted by Feng  
591 Zhang.<sup>77</sup> The CXCR4 sgRNA sequence was provided by Judd Hultquist and is as follows:  
592 GAAGCGTGATGACAAAGAGG.<sup>57</sup> ABI and PLY domains<sup>45</sup> were codon optimized and  
593 synthesized by Thermo Fisher and IDT, respectively.

594

595 **Plasmid preparation.** Bacteria were grown overnight in 100 mL LB + Amp cultures for 12-14 h.  
596 Cultures were spun at 3,000 g for 10 min to pellet the bacteria, and pellets were resuspended and  
597 incubated for 30 min in 4 mL of 25 mM Tris pH 8.0, 10 mM EDTA, 15% sucrose, and 5 mg/mL  
598 lysozyme. Bacteria were lysed for 15 min in 8 mL of 0.2 M NaOH and 1% SDS, followed by a 15  
599 min neutralization in 5 mL of 3 M sodium acetate (pH 5.2). The precipitate was pelleted at 9,000  
600 g for 20 min, and supernatant was filtered through cheese cloth and incubated for 1-3 h at 37°C  
601 with 3 µL of 10 mg/mL RNase A (Thermo Fisher). Samples were extracted with 5 mL phenol  
602 chloroform, and the aqueous layer was recovered after centrifugation at 7,500 g for 20 min. A  
603 second phenol chloroform extraction was performed with 7 mL solvent. 0.7 volumes isopropanol  
604 was added to the recovered supernatant, and samples were inverted and incubated at room  
605 temperature for 10 min prior to centrifugation at 9,000 g for 20 min to pellet the DNA mixture.  
606 Pellets were briefly dried and resuspended in 1 mL of 6.5% PEG 20,000 and 0.4 M NaCl. DNA  
607 was incubated on ice overnight and pelleted at 21,000 g for 20 min. The supernatant was  
608 removed, and pellets were washed in cold absolute ethanol and dried at 37°C before  
609 resuspension in TE buffer (10mM Tris, 1 mM EDTA, pH 8.0). DNA was diluted to 1 µg/µL using a  
610 Nanodrop 2000 (Thermo Fisher).

611

612 **Cell culture.** HEK293FT cells (Thermo Fisher R70007) were cultured in Dulbecco's Modified  
613 Eagle Medium (DMEM, Gibco 31600-091) supplemented with 10% FBS (Gibco 16140-071), 1%  
614 penicillin-streptomycin (Gibco 15140-122), and 4 mM additional L-glutamine (Gibco 25030-081).  
615 Jurkat T cells (ATCC TIB-152) were cultured in Roswell Park Memorial Institute Medium (RPMI  
616 1640, Gibco 31800-105) supplemented with 10% FBS, 1% pen-strep, and 4 mM L-glutamine.  
617 Sublines generated from these cell lines were cultured in the same way. Cells were subcultured  
618 at a 1:5 or 1:10 ratio every 2-3 d, using Trypsin-EDTA (Gibco 25300-054) to remove adherent  
619 cells from the plate. Lenti-X cells (Takara) were cultured the same way with additional 1 mM  
620 sodium pyruvate (Thermo Fisher 11360-070). Primary human CD4<sup>+</sup> T cells were cultured in RPMI  
621 supplemented with 10% FBS, 1% pen-strep, 5 mM HEPES, 5 mM sodium pyruvate, and 20 U/mL  
622 IL-2 (added fresh at time of use). Cells were maintained at 37°C at 5% CO<sub>2</sub>. HEK293FT and  
623 Jurkat cells tested negative for mycoplasma with the MycoAlert Mycoplasma Detection Kit (Lonza  
624 LT07-318).

625  
626 **Transfection.** For transfection of HEK293FT cells and derived cell lines in 15 cm dishes for EV  
627 packaging, cells were plated at a density of 18x10<sup>6</sup> cells/dish (1x10<sup>6</sup> cells/mL) 6-12 h prior to  
628 transfection. Cells were transfected with 30 µg DNA plus 1 µg of a fluorescent transfection control  
629 via the calcium phosphate method. Plasmid DNA was mixed with 2 M CaCl<sub>2</sub> (final concentration  
630 0.3 M) and added to a 2x HEPES-buffered saline solution (280 mM NaCl, 0.5 M HEPES, 1.5 mM  
631 Na<sub>2</sub>HPO<sub>4</sub>) dropwise in a 1:1 ratio and mixed seven times by pipetting. The transfection solution  
632 w-as incubated for 3 min, mixed eight times by pipetting, and added gently to the side of the plate.  
633 For transfection of HEK293FT cells in 10 cm dishes for EV packaging, cells were plated at a  
634 density of 5x10<sup>6</sup> cells/ dish (6.25x10<sup>5</sup> cells/mL) and transfected with 20 µg DNA plus 1 µg  
635 transfection control as described above, adding transfection mixture dropwise to the dish. Lenti-  
636 X cells were transfected in 10 cm dishes in the same manner, though were plated 24 h prior to  
637 transfection as per the manufacturer recommendation (Takara). For transfection of HEK293FT  
638 cells in 24 well plates, cells were plated at a density of 1.7x10<sup>5</sup> cells/well (3.4x10<sup>5</sup> cells/mL) and  
639 transfected with 200 µg DNA as described above, adding transfection mixture dropwise to the  
640 well. Medium was changed 12-16 h later. Jurkat lipofectamine transfections were performed  
641 according to the manufacturer's protocol.

642  
643 **Cell line generation.** To generate lentivirus, HEK293FT or Lenti-X cells were plated in 10 cm  
644 dishes at a density of 5x10<sup>6</sup> cells/dish (6.25x10<sup>5</sup> cells/mL). 6-12 h later for HEK293FT or 24 h later  
645 for Lenti-X, cells were transfected with 10 µg of viral vector, 8 µg psPAX2, and 3 µg pMD2.G via  
646 calcium phosphate transfection as described above. Medium was changed 12-16 h later. 28 h  
647 post media change, lentivirus was harvested from the conditioned medium. Medium was  
648 centrifuged at 500 g for 2 min to clear cells, and the supernatant was filtered through a 0.45 µm  
649 pore filter (VWR). Lentivirus was concentrated from the filtered supernatant by ultracentrifugation  
650 in Ultra Clear tubes (Beckman Coulter 344059) at 100,420 g at 4°C in a Beckman Coulter Optima  
651 L-80 XP ultracentrifuge using an SW41Ti rotor. Supernatant was aspirated, leaving virus in ~100  
652 µL final volume, and concentrated lentivirus was left on ice for at least 30 min prior to  
653 resuspension, then used to transduce ~1x10<sup>5</sup> cells, either plated at the time of transduction or the  
654 day before. When appropriate, drug selection began 2 d post transduction, using antibiotic  
655 concentrations of 1 µg/mL puromycin (Invitrogen ant-pr) and 10 µg/mL blasticidin (Alfa Aesar  
656 J61883) on HEK293FT cells or 0.2 µg/mL puromycin and 2 µg/mL blasticidin on Jurkat cells. Cells  
657 were kept in antibiotics for at least two weeks with subculturing every one to two days.

658  
659 **Sorting of Cas9 reporter lines.** Cells were prepared for fluorescence-activated cell sorting  
660 (FACS) by resuspending in either DMEM or RPMI, as appropriate, supplemented with 10% FBS,  
661 25 mM HEPES, and 100 µg/mL gentamycin (Amresco 0304) at a concentration of 1x10<sup>7</sup> cells/mL.  
662 Cells were sorted for the highest mTFP1 expressors (top 10% or less) lacking any dTomato

663 expression on a BD FACS Aria II using a 488 nm laser (530/30 filter) and a 562 nm laser (582/15  
664 filter). Cells were collected in DMEM or RPMI, as appropriate, supplemented with 20% FBS, 25  
665 mM HEPES, and 100 µg/mL gentamycin. Cells were spun down and resuspended in normal  
666 growth medium with 100 µg/mL gentamycin for recovery.

667  
668 **EV production, isolation, and characterization.** EV producer cell lines were plated in 10 or 15  
669 cm dishes and transfected the same day by the calcium phosphate method where appropriate.  
670 Medium was changed to EV-depleted medium the following morning. EV-depleted medium was  
671 made by supplementing DMEM with 10% exosome depleted FBS (Gibco A27208-01), 1% pen-  
672 strep, and 4 mM L-glutamine. EVs were harvested from the conditioned medium 24-36 h post  
673 medium change by differential centrifugation as previously described.<sup>36,37</sup> Briefly, conditioned  
674 medium was cleared of debris by centrifugation at 300 g for 10 min to remove cells followed by  
675 centrifugation at 2,000 g for 20 min to remove dead cells and apoptotic bodies. Supernatant was  
676 centrifuged at 15,000 g for 30 min in a Beckman Coulter Avanti J-26XP centrifuge with a J-LITE  
677 JLA 16.25 rotor to pellet microvesicles. Supernatant was collected and exosomes pelleted by  
678 ultracentrifugation at 120,416 g for 135 min in a Beckman Coulter Optima L-80 XP ultracentrifuge  
679 with an SW41 Ti rotor, using polypropylene ultracentrifuge tubes (Beckman Coulter 331372). All  
680 centrifugation steps were performed at 4°C. EV pellets were left in ~100-200 µL of conditioned  
681 media and incubated on ice for at least 30 min after supernatant removal before resuspension.  
682 EV concentration was determined by NanoSight analysis. Samples were diluted in PBS to  
683 concentrations on the order of 10<sup>8</sup> particles/mL for analysis. NanoSight analysis was performed  
684 on an NS300 (Malvern), software version 3.4. Three 30 s videos were acquired per sample using  
685 a 642 nm laser on a camera level of 14, an infusion rate of 30, and a detection threshold of 7.  
686 Default settings were used for the blur, minimum track length, and minimum expected particle  
687 size. EV concentrations were defined as the mean of the concentrations calculated from each  
688 video. Size distributions were generated by the software. For TEM, samples were fixed for 10 min  
689 in Eppendorf tubes by adding 65 µL of 4% PFA to 200 µL of EVs. 15 µL of fixed suspension was  
690 pipetted onto a plasma cleaned (PELCO easiGlow), formvar/carbon coated grid (EMS 300 mesh).  
691 After 10 min, the solution was removed by wicking with a wedge of filter paper, then washed by  
692 inverting the grid onto a drop of buffer for 30 seconds twice, followed with diH<sub>2</sub>O once. A 2%  
693 uranyl acetate (Ted Pella) stain was applied twice and wicked after 30 s. Grids were allowed dry  
694 before storing in a grid box until use. Grids were imaged in a JEOL JEM 1230 TEM (JEOL USA)  
695 with a 100 KV accelerating voltage. Data was acquired with a Orius SC1000 CCD camera  
696 (Gatan). EVs were stored on ice and used within 10 days or stored at -80°C for long term  
697 preservation.

698  
699 **Immunoblotting.** For western blot analysis, cells were lysed in RIPA buffer (150 mM NaCl, 50  
700 mM Tris-HCl pH 8.0, 1% Triton X-100, 0.5% sodium deoxycholate, 0.1% SDS, and one protease  
701 inhibitor cocktail tablet (Pierce PIA32953) per 10 mL) and incubated on ice for 30 min. Lysates  
702 were cleared by centrifugation at 12,000 g for 20 min at 4°C, and supernatant was harvested.  
703 Protein concentration was determined by BCA assay (Pierce) according to the manufacturer's  
704 instructions. Samples were normalized by protein content ranging from 1 to 2 µg (for cell lysates)  
705 or by vesicle count ranging from 1x10<sup>7</sup> to 6x10<sup>8</sup> (for EVs). Samples were heated in Laemmli buffer  
706 (60 mM Tris-HCl pH 6.8, 10% glycerol, 2% SDS, 100 mM dithiothreitol, 0.01% bromophenol blue)  
707 at 70°C (for membrane-bound scFv and calnexin) or 98°C (for Cas9, CD9, CD81, and Alix) for 10  
708 min. Samples were loaded onto 4-15% polyacrylamide gradient Mini-PROTEAN TGX precast  
709 protein gels (Bio-Rad) and run at 50 V for 10 min followed by 100 V for 1 h. Protein was transferred  
710 to a PVDF membrane (Bio-Rad) at 100 V for 45 min. For anti-FLAG blots, membranes were  
711 blocked in 3% milk in TBS (50 mM Tris, 138 mM NaCl, 2.7 mM KCl, pH 8.0) for 30 min.  
712 Membranes were washed once in TBS for 5 min, then incubated in primary anti-FLAG antibody  
713 (Sigma F1804) diluted 1:1000 in 3% milk in TBS overnight at 4°C. Membranes were washed once



714 for 5 min in TBS and twice in TBST 1 (50 mM Tris, 138 mM NaCl, 2.7 mM KCl, 0.05% Tween 20,  
715 pH 8.0) for 5 min each prior to secondary antibody staining. For all other blots, membranes were  
716 blocked in 5% milk in TBST 2 (50 mM Tris, 150 mM NaCl, 0.1% Tween 20, pH 7.6) for 1 h.  
717 Membranes were incubated in primary antibody diluted in 5% milk in TBST 2 overnight at 4°C.  
718 Primary antibodies include anti-HA (Cell Signaling Technology 377245 C29F4, 1:1000), anti-CD9  
719 (Santa Cruz Biotechnology sc-13118, 1:500), anti-CD81 (Santa Cruz Biotechnology sc-23962,  
720 1:500, run in non-reducing conditions), anti-Alix (Abcam Ab117600, 1:500), and anti-calnexin  
721 (Abcam Ab22595, 1:1000). Membranes were washed three times in TBST 2 for 5 min each prior  
722 to secondary antibody staining. HRP-conjugated anti-mouse (Cell Signaling Technology 7076)  
723 and anti-rabbit (Invitrogen 32460) secondary antibodies were diluted 1:3000 in 5% milk in TBST  
724 2. Membranes were incubated in secondary antibody at room temperature for 1 h, then washed  
725 three times in TBST 2 (5 min washes). Membranes were probed with Clarity Western ECL  
726 Substrate (Bio-Rad) and either exposed to film, which was developed and scanned, or imaged  
727 using an Azure c280 imager. Images were cropped using Adobe Illustrator. No other image  
728 processing was employed.

729  
730 **Surface immunoblotting.** Cells were transferred to FACS tubes (adherent cells were harvested  
731 using FACS buffer (PBS pH 7.4 with 0.05% BSA and 2 mM EDTA) prior to staining) with 1 mL of  
732 FACS buffer and centrifuged at 150 g for 5 min. Supernatant was decanted, and cells were  
733 resuspended in 50  $\mu$ L of FACS buffer. 10  $\mu$ L of human IgG (Thermo Fisher 027102) was added,  
734 cells were flicked to mix, and were incubated at 4°C for 5 min. Conjugated primary antibody was  
735 then added at the manufacturer's recommended dilution, cells were flicked to mix and incubated  
736 at 4°C for 30 min. Cells were then washed three times with 1 mL of FACS buffer, centrifuging at  
737 150 g for 5 min and decanting the supernatant after each wash. Cells were resuspended in two  
738 drops of FACS buffer prior to flow cytometry. For Miltenyi Biotec antibodies, cells were stained at  
739 4°C for 15 min without blocking and were washed once prior to flow cytometry, as per  
740 manufacturer protocol. Antibodies used in this study were as follows: Anti-FLAG-APC (Abcam  
741 ab72569), anti-CD2-APC (R&D Systems FAB18561A), anti-CD25-PE (Miltenyi REA945, 130-  
742 115-628), anti-SLAM-PE (Miltenyi REA151, 130-123-970), and anti-mouse IgG1-APC (R&D  
743 Systems IC002A) or anti-human IgG1-PE (Miltenyi REA293, 130-113-438) were used as isotype  
744 controls where appropriate.

745  
746 **EV binding and uptake experiments.** Jurkat T cells or primary human CD4<sup>+</sup> T cells were  
747 incubated with EVs at an EV to cell ratio of 100,000:1 (typically  $1 \times 10^{10}$  EVs per  $1 \times 10^5$  cells) unless  
748 otherwise indicated. For Jurkats, cells were plated in a 48 well plate with 300  $\mu$ L total volume. For  
749 primary T cells, cells were plated in a 96 well plate with 200  $\mu$ L total volume. Cells were plated at  
750 the time of EV addition, and wells were brought to the appropriate volume with RPMI. For binding  
751 experiments, cells were incubated for 2 h at 37°C unless otherwise indicated, then washed three  
752 times in FACS buffer, centrifuging at 150 g for 5 min for Jurkat cells or 400 g for 3 min for primary  
753 T cells. Cells were resuspended in one drop of FACS buffer prior to flow cytometry. To adsorb  
754 EVs to aldehyde/sulfate latex beads (Thermo Fisher), EVs were mixed with beads at a ratio of  
755  $1 \times 10^9$  EVs per 2  $\mu$ L beads diluted 1:10 in PBS. Volumes were normalized across samples with  
756 PBS, and beads and EVs were incubated for 15 min at room temperature. Samples were then  
757 brought to 200  $\mu$ L with PBS and allowed to incubate for 2 h at room temperature while rocking.  
758 Cells were blocked with an anti-CD2 antibody binding the same epitope as the scFv (Beckman  
759 Coulter A60794) or with blank EVs for 1 h at 37°C prior or EV incubation where indicated. For EV  
760 uptake experiments with viral glycoproteins, cells were incubated with EVs for 16 h at 37°C. To  
761 prepare for analysis, cells were washed twice in PBS and incubated with two drops of trypsin-  
762 EDTA for 5 min at 37°C to remove surface bound vesicles. Cells were washed with RPMI to  
763 quench the trypsin, then washed twice more with FACS buffer prior to analysis.

764



765 **Analytical flow cytometry and analysis.** Flow cytometry was performed on a BD LSR Fortessa  
766 Special Order Research Product using the 562 nm laser for dTomato (582/15 filter), the 488 nm  
767 laser for EYFP (530/30 filter), and the 488 nm and 405 nm lasers for mTFP1 (530/30 filter and  
768 525/50 filter, respectively). Approximately 10,000 live cells were collected per sample for analysis.  
769 Data were analyzed using FlowJo v10 (FlowJo, LLC). Briefly, cells were identified using an FSC-  
770 A vs SSC-A plot and gated for singlets using an FSC-A vs FSC-H plot (**Supplementary Fig. 20**).  
771 Fluorescence data were compensated for spectral bleed-through where appropriate. Mean  
772 fluorescence intensity (MFI) of single-cell samples was exported and averaged across three  
773 biological replicates. Autofluorescence from untreated cells was subtracted from other samples.  
774 Standard error of the mean was propagated through calculations. Where indicated, 9 peak Ultra  
775 Rainbow Calibration Particles (Spherotech URCP-100-2H) were used to generate a calibration  
776 curve to convert fluorescence into absolute fluorescence units.

777  
778 **Confocal microscopy.** Cells were transfected via the calcium phosphate method on poly L-lysine  
779 coated glass coverslips and mounted on glass slides for imaging. Microscopy images were taken  
780 on Leica SP5 II laser scanning confocal microscope using a 100x oil-immersion objective. Bright-  
781 field images were acquired at a PMT setting of 443.0 V. A 514 nm laser at 20% intensity and 94%  
782 smart gain was used for fluorescence excitation. Emission spectra were captured from 520-540  
783 nm using an HyD sensor. Images were captured at 512 x 512 resolution at scanning speed of  
784 400 Hz. Pseudocolored fluorescence images were contrast-adjusted in ImageJ such that 4% of  
785 pixels were saturated.

786  
787 **Affinity chromatography.** Affinity chromatography isolation was performed as previously  
788 reported.<sup>46</sup> Briefly, an anti-FLAG affinity column was prepared by loading anti-FLAG M2 affinity  
789 gel (Sigma A2220-1ML) in a 4 mL 1 x 5 cm glass column (Bio-Rad) and drained via gravity flow.  
790 The column was washed with 5 mL TBS (50 mM Tris-HCl, 150 mM NaCl, pH 7.5) and equilibrated  
791 with three sequential 1 mL washes with regeneration buffer (0.1 M glycine-HCl, pH 3.5), followed  
792 by a 5 mL wash of TBS. Concentrated EVs were loaded onto the top of the column and chased  
793 with 1-2 mL of TBS. The column was incubated with EVs for 5 min before continuing. The flow  
794 through was then re-loaded onto the column such that the EV-containing medium passed through  
795 the matrix five times. The column was washed with 10 mL TBS prior to elution. EVs were eluted  
796 with 2.5 mL elution buffer (100 µg/mL 3x FLAG peptide (Sigma F4799-4MG) in TBS), which was  
797 incubated on the column for 5-10 min after the void fraction was drained (~1 mL). Five fractions  
798 of EVs were collected in 0.5 mL fractions (approximately 8 drops off the column per fraction). The  
799 column was regenerated with three sequential 1 mL washes with regeneration buffer and stored  
800 at 4°C in storage buffer (50% glycerol, 0.02% sodium azide in TBS).

801  
802 **Cas9 in vitro cleavage assays.** EVs were produced as described above with components  
803 transiently transfected in 10 cm dishes with the following DNA ratios: 6 µg anti-CD2 scFv, 9 µg  
804 Cas9 vector, 5 µg sgRNA vector, and 1 µg mTFP1 transfection control. EVs were lysed by  
805 incubation with mammalian protein extraction reagent (MPER, Thermo Fisher) for 10 min at room  
806 temperature (20-23°C) with gentle agitation. 200 ng of linearized target plasmid template was  
807 added to vesicles with Cas9 reagent buffer (IDT, Alt-R CRISPR-Cas9 System), and samples were  
808 incubated at 37°C for 1 h. Proteinase K (Thermo Fisher) was added to samples at 1 µL per 10 µL  
809 of reaction mixture and incubated at 55°C for 10 min. Samples were run on a 1% agarose gel  
810 stained with SYBR safe (Thermo Fisher) and imaged using a BioDoc-It imaging system (VWR).

811  
812 **Primary CD4<sup>+</sup> T cell isolation, culture, and activation.** Peripheral blood mononuclear cells  
813 (PBMCs) were isolated by density gradient centrifugation using Ficoll-Paque Plus (GE Health  
814 Care, #17-1440-02). PBMCs were washed with PBS three times to remove platelets and  
815 suspended at a final concentration of 5x10<sup>8</sup> cells/mL in PBS, 0.5% BSA, 2 mM EDTA. Bulk CD4<sup>+</sup>

816 T cells were subsequently isolated from PBMCs by magnetic negative selection using an  
817 EasySep Human CD4<sup>+</sup> T Cell Isolation Kit (STEMCELL, per manufacturer's instructions). Isolated  
818 CD4<sup>+</sup> T cells were suspended in RPMI-1640 (Gibco) supplemented with 5 mM 4-(2-hydroxyethyl)-  
819 1-piperazineethanesulfonic acid (HEPES, Corning), 50 µg/mL penicillin/streptomycin (P/S,  
820 Corning), 5 mM sodium pyruvate (Corning), and 10% FBS (Gibco). Media was supplemented with  
821 20 IU/mL IL-2 (Miltenyi) immediately before use. For activation, bulk CD4<sup>+</sup> T cells were  
822 immediately plated on anti-CD3 coated plates [coated for 12 h at 4°C with 20 µg/mL anti-CD3  
823 (UCHT1, Tonbo Biosciences)] in the presence of 5 µg/mL soluble anti-CD28 (CD28.2, Tonbo  
824 Biosciences). Cells were stimulated for 72 h at 37°C and 5% CO<sub>2</sub>. After stimulation, cell purity  
825 and activation were verified by CD4/CD25 immunostaining and flow cytometry as previously  
826 described.<sup>57</sup>

827  
828 **EV functional delivery experiments.** EVs were produced as described above with components  
829 transiently transfected in 10 cm dishes with the following DNA ratios: 6 µg anti-CD2 scFv, 9 µg  
830 dual Cas9 and sgRNA vector, either 2.5 µg each of measles virus glycoproteins H/ F or 3 µg VSV-  
831 G with 2 µg filler promoterless pcDNA, and 1 µg mTFP1 transfection control. For generation of  
832 vesicles lacking the scFv, a PDGFR-bound 3x FLAG tag construct in the same vector backbone  
833 was transfected at the same plasmid copy number in place of the scFv. EVs were delivered to  
834 primary human CD4<sup>+</sup> T cells as described above. Cells were cultured in the presence of EVs for  
835 6 days, adding fresh supplemental RPMI and IL-2 every 2-3 days. For repeat dose administration,  
836 100 µL of media were carefully removed from the top of each well and replaced with 100 µL fresh  
837 EVs and media. Cells were harvested on day 6 and washed with PBS by centrifugation at 400 g  
838 for 3 min at 4°C to pellet. Cells were resuspended in 100 µL QuickExtract DNA Extract Solution  
839 (Lucigen QE9050), and genomic DNA was harvested according to the manufacturer's protocol.  
840 Briefly, samples were vortexed for 15 s, heated at 65°C for 6 min, vortexed for 15 s, and heated  
841 at 98°C for 2 min. DNA was stored at -80°C.

842  
843 **High Throughput Sequencing (HTS) library generation.** Approximately 100 ng genomic DNA  
844 was used as a template in the first round PCR amplification. The CXCR4 region of interest was  
845 amplified with the following primers: F1: 5' ACA CTC TTT CCC TAC ACG CTC TTC CGA TCT  
846 NNN NNG AGA AGC ATG ACG GAC AAG TAC AG 3' R1: 5' GTG ACT GGA GTT CAG ACG  
847 TGT GCT CTT CCG ATC TNN NNN TCC CAA AGT ACC AGT TTG CCA C 3' The PCR protocol  
848 was as follows: 98°C 3 min, (98°C 15 s, 65°C 30 s, 72°C 3 s) x 15, 72°C 5 min, 4°C 5 min. PCR  
849 products were purified using MagJET beads (Thermo Fisher K2821) and used as templates in a  
850 second round PCR amplification with the following primers: F2: 5' AAT GAT ACG GCG ACC GAG  
851 ATC TAC ACT CTT TCC CTA CAC GAC GCT CTT CCG ATC T 3' R2: 5' CAA GCA GAA GAC  
852 GGC ATA CGA GAT-Index-GTG ACT GGA GTT CAG ACG TGT GCT C 3' The PCR cycles were  
853 as follows: 98°C 3 min, (98°C 15 s, 69°C 30 s, 72°C 5 s) x 20, 72°C 5 min, 4°C 5 min. PCR  
854 products were again purified using MagJET beads prior to HTS. Both first and second round  
855 PCRs were run with primer concentrations of 200 nM and Phusion DNA polymerase.

856 **HTS.** Genomic DNA sample concentrations were measured on a Qubit using an HS dsDNA kit  
857 and pooled in libraries with equimolar concentrations. Libraries were diluted to 4 nM in serial  
858 dilutions. Libraries and PhiX were denatured with NaOH according to the Illumina MiSeq guide  
859 and diluted to 14 pM. Reaction mixtures consisted of 8% PhiX and 92% library. Samples were  
860 run on an Illumina MiSeq using a MiSeq Reagent Kit v3, collecting paired-end reads. Data were  
861 analyzed using custom code developed by 496code (see **Data and code availability**). The  
862 overall strategy for analyzing these data is summarized in **Supplementary Note 1**.

863  
864 **Statistical analysis.** Statistical details are described in the figure legends. Unless otherwise  
865 stated, three independent biological replicates (cells) or technical replicates (beads) were

866 analyzed per condition, and the mean fluorescence intensity of approximately 10,000 live single  
867 cells or beads were analyzed per sample. Unless otherwise indicated, error bars represent the  
868 standard error of the mean. Pairwise comparisons were made using two-tailed Student's t-tests  
869 in Excel with the null hypothesis that the two samples were equal. The significance threshold was  
870 set to 0.05. Tests were followed by a Benjamini-Hochberg procedure applied within each panel  
871 of a given figure to decrease the false discovery rate.

872  
873 **Reporting summary.** Further information on research design is available in the Nature Research  
874 Reporting Summary linked to this article.

#### 875 876 **Data and code availability**

877  
878 All reported experimental data are included as **Source Data**. The raw datasets generated during  
879 and/or analyzed during the current study are available from the corresponding author on  
880 reasonable request. Plasmid maps for all plasmids reported in this study are provided as  
881 annotated GenBank files in **Source Data**. Key plasmids used in this study are deposited with and  
882 distributed by Addgene, including complete and annotated GenBank files, at  
883 [https://www.addgene.org/Joshua\\_Leonard/](https://www.addgene.org/Joshua_Leonard/). Code for analyzing HTS data will be provided at  
884 <https://github.com/leonardlab/GEMINI-HTS> under an open-source license along with the final  
885 published version of this manuscript.  
886

## 887 REFERENCES

- 888 1 Sadelain, M., Rivière, I. & Riddell, S. Therapeutic T cell engineering. *Nature* **545**, 423-  
889 431, doi:10.1038/nature22395 (2017).
- 890 2 Yin, C. *et al.* In Vivo Excision of HIV-1 Provirus by saCas9 and Multiplex Single-Guide  
891 RNAs in Animal Models. *Molecular therapy : the journal of the American Society of Gene*  
892 *Therapy* **25**, 1168-1186, doi:10.1016/j.ymthe.2017.03.012 (2017).
- 893 3 Kaminski, R. *et al.* Excision of HIV-1 DNA by gene editing: a proof-of-concept in vivo  
894 study. *Gene therapy* **23**, 690-695, doi:10.1038/gt.2016.41 (2016).
- 895 4 Dash, P. K. *et al.* Sequential LASER ART and CRISPR Treatments Eliminate HIV-1 in a  
896 Subset of Infected Humanized Mice. *Nature communications* **10**, 2753,  
897 doi:10.1038/s41467-019-10366-y (2019).
- 898 5 Louis Jeune, V., Joergensen, J. A., Hajjar, R. J. & Weber, T. Pre-existing anti-adenovirus  
899 associated virus antibodies as a challenge in AAV gene therapy. *Human gene therapy*  
900 *methods* **24**, 59-67, doi:10.1089/hgtb.2012.243 (2013).
- 901 6 Zincarelli, C., Soltys, S., Rengo, G. & Rabinowitz, J. E. Analysis of AAV serotypes 1-9  
902 mediated gene expression and tropism in mice after systemic injection. *Mol Ther* **16**,  
903 1073-1080, doi:10.1038/mt.2008.76 (2008).
- 904 7 Hamilton, J. R. *et al.* Targeted delivery of CRISPR-Cas9 and transgenes enables  
905 complex immune cell engineering. *Cell reports* **35**, 109207,  
906 doi:10.1016/j.celrep.2021.109207 (2021).
- 907 8 Banskota, S. *et al.* Engineered virus-like particles for efficient in vivo delivery of  
908 therapeutic proteins. *Cell* **185**, 250-265.e216, doi:10.1016/j.cell.2021.12.021 (2022).
- 909 9 Segel, M. *et al.* Mammalian retrovirus-like protein PEG10 packages its own mRNA and  
910 can be pseudotyped for mRNA delivery. *Science* **373**, 882-889,  
911 doi:10.1126/science.abg6155 (2021).
- 912 10 Otten, G. R. *et al.* Potent immunogenicity of an HIV-1 gag-pol fusion DNA vaccine  
913 delivered by in vivo electroporation. *Vaccine* **24**, 4503-4509,  
914 doi:10.1016/j.vaccine.2005.08.017 (2006).
- 915 11 Rurik, J. G. *et al.* CAR T cells produced in vivo to treat cardiac injury. *Science* **375**, 91-  
916 96, doi:10.1126/science.abm0594 (2022).
- 917 12 Luther, D. C., Lee, Y. W., Nagaraj, H., Scaletti, F. & Rotello, V. M. Delivery approaches  
918 for CRISPR/Cas9 therapeutics in vivo: advances and challenges. *Expert opinion on drug*  
919 *delivery* **15**, 905-913, doi:10.1080/17425247.2018.1517746 (2018).
- 920 13 Liu, C., Zhang, L., Liu, H. & Cheng, K. Delivery strategies of the CRISPR-Cas9 gene-  
921 editing system for therapeutic applications. *Journal of controlled release : official journal*  
922 *of the Controlled Release Society* **266**, 17-26, doi:10.1016/j.jconrel.2017.09.012 (2017).
- 923 14 Dardalhon, V. *et al.* Lentivirus-mediated gene transfer in primary T cells is enhanced by  
924 a central DNA flap. *Gene therapy* **8**, 190-198, doi:10.1038/sj.gt.3301378 (2001).
- 925 15 Valadi, H. *et al.* Exosome-mediated transfer of mRNAs and microRNAs is a novel  
926 mechanism of genetic exchange between cells. *Nat Cell Biol* **9**, 654-659,  
927 doi:10.1038/ncb1596 (2007).
- 928 16 Soderberg, A., Barral, A. M., Soderstrom, M., Sander, B. & Rosen, A. Redox-signaling  
929 transmitted in trans to neighboring cells by melanoma-derived TNF-containing  
930 exosomes. *Free radical biology & medicine* **43**, 90-99,  
931 doi:10.1016/j.freeradbiomed.2007.03.026 (2007).
- 932 17 Alvarez-Erviti, L. *et al.* Delivery of siRNA to the mouse brain by systemic injection of  
933 targeted exosomes. *Nat Biotechnol* **29**, 341-345, doi:10.1038/nbt.1807 (2011).
- 934 18 Arslan, F. *et al.* Mesenchymal stem cell-derived exosomes increase ATP levels,  
935 decrease oxidative stress and activate PI3K/Akt pathway to enhance myocardial viability  
936 and prevent adverse remodeling after myocardial ischemia/reperfusion injury. *Stem cell*  
937 *research* **10**, 301-312, doi:10.1016/j.scr.2013.01.002 (2013).



- 938 19 Ohno, S. *et al.* Systemically injected exosomes targeted to EGFR deliver antitumor  
939 microRNA to breast cancer cells. *Mol Ther* **21**, 185-191, doi:10.1038/mt.2012.180  
940 (2013).
- 941 20 Kojima, R. *et al.* Designer exosomes produced by implanted cells intracerebrally deliver  
942 therapeutic cargo for Parkinson's disease treatment. *Nat Commun* **9**, 1305,  
943 doi:10.1038/s41467-018-03733-8 (2018).
- 944 21 He, C. *et al.* Epithelial cell -derived microvesicles: A safe delivery platform of  
945 CRISPR/Cas9 conferring synergistic anti-tumor effect with sorafenib. *Experimental cell*  
946 *research* **392**, 112040, doi:10.1016/j.yexcr.2020.112040 (2020).
- 947 22 Chen, R. *et al.* Friend or Foe? Evidence Indicates Endogenous Exosomes Can Deliver  
948 Functional gRNA and Cas9 Protein. *Small (Weinheim an der Bergstrasse, Germany)* **15**,  
949 e1902686, doi:10.1002/sml.201902686 (2019).
- 950 23 Yao, X. *et al.* Engineered extracellular vesicles as versatile ribonucleoprotein delivery  
951 vehicles for efficient and safe CRISPR genome editing. *Journal of extracellular vesicles*  
952 **10**, e12076, doi:10.1002/jev2.12076 (2021).
- 953 24 McConnell R., Y. M., Finn J. in *International Society for Extracellular Vesicles*. (Taylor &  
954 Francis Online).
- 955 25 Kooijmans, S. A. *et al.* Electroporation-induced siRNA precipitation obscures the  
956 efficiency of siRNA loading into extracellular vesicles. *Journal of controlled release :*  
957 *official journal of the Controlled Release Society* **172**, 229-238,  
958 doi:10.1016/j.jconrel.2013.08.014 (2013).
- 959 26 Théry, C. *et al.* Minimal information for studies of extracellular vesicles 2018  
960 (MISEV2018): a position statement of the International Society for Extracellular Vesicles  
961 and update of the MISEV2014 guidelines. *Journal of extracellular vesicles* **7**, 1535750,  
962 doi:10.1080/20013078.2018.1535750 (2018).
- 963 27 Knipping, F. *et al.* Disruption of HIV-1 co-receptors CCR5 and CXCR4 in primary human  
964 T cells and hematopoietic stem and progenitor cells using base editing. *Molecular*  
965 *therapy : the journal of the American Society of Gene Therapy* **30**, 130-144,  
966 doi:10.1016/j.ymthe.2021.10.026 (2022).
- 967 28 Li, S., Holguin, L. & Burnett, J. C. CRISPR/Cas9-mediated gene disruption of  
968 endogenous co-receptors confers broad resistance to HIV-1 in human primary cells and  
969 humanized mice. *bioRxiv : the preprint server for biology*, 2021.2006.2030.450601,  
970 doi:10.1101/2021.06.30.450601 (2021).
- 971 29 Stranford, D. M., Hung, M. E., Gargus, E. S., Shah, R. N. & Leonard, J. N. A Systematic  
972 Evaluation of Factors Affecting Extracellular Vesicle Uptake by Breast Cancer Cells.  
973 *Tissue Eng Part A* **23**, 1274-1282, doi:10.1089/ten.TEA.2017.0158 (2017).
- 974 30 Longatti, A. *et al.* High affinity single-chain variable fragments are specific and versatile  
975 targeting motifs for extracellular vesicles. *Nanoscale* **10**, 14230-14244,  
976 doi:10.1039/c8nr03970d (2018).
- 977 31 Wang, J. H. *et al.* Anti-HER2 scFv-Directed Extracellular Vesicle-Mediated mRNA-Based  
978 Gene Delivery Inhibits Growth of HER2-Positive Human Breast Tumor Xenografts by  
979 Prodrug Activation. *Mol Cancer Ther* **17**, 1133-1142, doi:10.1158/1535-7163.MCT-17-  
980 0827 (2018).
- 981 32 Kooijmans, S. A. *et al.* Display of GPI-anchored anti-EGFR nanobodies on extracellular  
982 vesicles promotes tumour cell targeting. *Journal of extracellular vesicles* **5**, 31053,  
983 doi:10.3402/jev.v5.31053 (2016).
- 984 33 Connelly, R. J. *et al.* Mitogenic properties of a bispecific single-chain Fv-Ig fusion  
985 generated from CD2-specific mAb to distinct epitopes. *Int Immunol* **10**, 1863-1872,  
986 doi:10.1093/intimm/10.12.1863 (1998).
- 987 34 Telerman, A. *et al.* Internalization of human T lymphocyte receptors. *European journal of*  
988 *immunology* **17**, 991-997, doi:10.1002/eji.1830170715 (1987).



- 989 35 Chang, Z. L. *et al.* Rewiring T-cell responses to soluble factors with chimeric antigen  
990 receptors. *Nat Chem Biol* **14**, 317-324, doi:10.1038/nchembio.2565 (2018).
- 991 36 Thery, C., Amigorena, S., Raposo, G. & Clayton, A. Isolation and characterization of  
992 exosomes from cell culture supernatants and biological fluids. *Current protocols in cell*  
993 *biology / editorial board, Juan S. Bonifacino ... [et al.] Chapter 3*, Unit 3.22,  
994 doi:10.1002/0471143030.cb0322s30 (2006).
- 995 37 Jeppesen, D. K. *et al.* Comparative analysis of discrete exosome fractions obtained by  
996 differential centrifugation. *J Extracell Vesicles* **3**, 25011, doi:10.3402/jev.v3.25011  
997 (2014).
- 998 38 Bu, J. *et al.* An Avidity-Based PD-L1 Antagonist Using Nanoparticle-Antibody  
999 Conjugates for Enhanced Immunotherapy. *Nano letters* **20**, 4901-4909,  
1000 doi:10.1021/acs.nanolett.0c00953 (2020).
- 1001 39 Raab, D., Graf, M., Notka, F., Schödl, T. & Wagner, R. The GeneOptimizer Algorithm:  
1002 using a sliding window approach to cope with the vast sequence space in  
1003 multiparameter DNA sequence optimization. *Systems and synthetic biology* **4**, 215-225,  
1004 doi:10.1007/s11693-010-9062-3 (2010).
- 1005 40 Kooijmans, S. A. A., Gitz-Francois, J., Schiffelers, R. M. & Vader, P. Recombinant  
1006 phosphatidylserine-binding nanobodies for targeting of extracellular vesicles to tumor  
1007 cells: a plug-and-play approach. *Nanoscale* **10**, 2413-2426, doi:10.1039/c7nr06966a  
1008 (2018).
- 1009 41 Hung, M. E. & Leonard, J. N. A platform for actively loading cargo RNA to elucidate  
1010 limiting steps in EV-mediated delivery. *J Extracell Vesicles* **5**, 31027,  
1011 doi:10.3402/jev.v5.31027 (2016).
- 1012 42 Yim, N. *et al.* Exosome engineering for efficient intracellular delivery of soluble proteins  
1013 using optically reversible protein-protein interaction module. *Nature communications* **7**,  
1014 12277, doi:10.1038/ncomms12277 (2016).
- 1015 43 Heath, N. *et al.* Endosomal escape enhancing compounds facilitate functional delivery of  
1016 extracellular vesicle cargo. *Nanomedicine (London, England)* **14**, 2799-2814,  
1017 doi:10.2217/nnm-2019-0061 (2019).
- 1018 44 Putyrski, M. & Schultz, C. Protein translocation as a tool: The current rapamycin story.  
1019 *FEBS Letters* **586**, 2097-2105, doi:https://doi.org/10.1016/j.febslet.2012.04.061 (2012).
- 1020 45 Gao, Y. *et al.* Complex transcriptional modulation with orthogonal and inducible dCas9  
1021 regulators. *Nature methods* **13**, 1043-1049, doi:10.1038/nmeth.4042 (2016).
- 1022 46 Hung, M. E., Lenzini, S. B., Stranford, D. M. & Leonard, J. N. Enrichment of Extracellular  
1023 Vesicle Subpopulations Via Affinity Chromatography. *Methods Mol Biol* **1740**, 109-124,  
1024 doi:10.1007/978-1-4939-7652-2\_9 (2018).
- 1025 47 Somiya, M. & Kuroda, S. Real-Time Luminescence Assay for Cytoplasmic Cargo  
1026 Delivery of Extracellular Vesicles. *Analytical chemistry* **93**, 5612-5620,  
1027 doi:10.1021/acs.analchem.1c00339 (2021).
- 1028 48 Mangeot, P. E. *et al.* Protein transfer into human cells by VSV-G-induced nanovesicles.  
1029 *Mol Ther* **19**, 1656-1666, doi:10.1038/mt.2011.138 (2011).
- 1030 49 Cronin, J., Zhang, X.-Y. & Reiser, J. Altering the tropism of lentiviral vectors through  
1031 pseudotyping. *Curr Gene Ther* **5**, 387-398, doi:10.2174/1566523054546224 (2005).
- 1032 50 Frecha, C. *et al.* Stable transduction of quiescent T cells without induction of cycle  
1033 progression by a novel lentiviral vector pseudotyped with measles virus glycoproteins.  
1034 *Blood* **112**, 4843-4852, doi:10.1182/blood-2008-05-155945 (2008).
- 1035 51 Frecha, C. *et al.* Measles Virus Glycoprotein-Pseudotyped Lentiviral Vector-Mediated  
1036 Gene Transfer into Quiescent Lymphocytes Requires Binding to both SLAM and CD46  
1037 Entry Receptors. *Journal of virology* **85**, 5975-5985, doi:10.1128/JVI.00324-11 (2011).
- 1038 52 Karampetsou, M. P., Comte, D., Kis-Toth, K., Kyttaris, V. C. & Tsokos, G. C. Expression  
1039 patterns of signaling lymphocytic activation molecule family members in peripheral blood

- 1040 mononuclear cell subsets in patients with systemic lupus erythematosus. *PloS one* **12**,  
1041 e0186073-e0186073, doi:10.1371/journal.pone.0186073 (2017).
- 1042 53 Hashiguchi, T., Maenaka, K. & Yanagi, Y. Measles virus hemagglutinin: structural  
1043 insights into cell entry and measles vaccine. *Front Microbiol* **2**, 247,  
1044 doi:10.3389/fmicb.2011.00247 (2011).
- 1045 54 Gonçalves-Carneiro, D., McKeating, J. A. & Bailey, D. The Measles Virus Receptor  
1046 SLAMF1 Can Mediate Particle Endocytosis. *Journal of virology* **91**,  
1047 doi:10.1128/jvi.02255-16 (2017).
- 1048 55 Soares, A. R. *et al.* Gap junctional protein Cx43 is involved in the communication  
1049 between extracellular vesicles and mammalian cells. *Scientific reports* **5**, 13243,  
1050 doi:10.1038/srep13243 (2015).
- 1051 56 Schumann, K. *et al.* Generation of knock-in primary human T cells using Cas9  
1052 ribonucleoproteins. *Proceedings of the National Academy of Sciences of the United*  
1053 *States of America* **112**, 10437-10442, doi:10.1073/pnas.1512503112 (2015).
- 1054 57 Hultquist, J. F. *et al.* A Cas9 Ribonucleoprotein Platform for Functional Genetic Studies  
1055 of HIV-Host Interactions in Primary Human T Cells. *Cell reports* **17**, 1438-1452,  
1056 doi:10.1016/j.celrep.2016.09.080 (2016).
- 1057 58 Liu, S. *et al.* HIV-1 inhibition in cells with CXCR4 mutant genome created by CRISPR-  
1058 Cas9 and piggyBac recombinant technologies. *Sci Rep* **8**, 8573, doi:10.1038/s41598-  
1059 018-26894-4 (2018).
- 1060 59 Breuer, C. B. *et al.* In vivo engineering of lymphocytes after systemic exosome-  
1061 associated AAV delivery. *Sci Rep* **10**, 4544, doi:10.1038/s41598-020-61518-w (2020).
- 1062 60 Shrivastava, S. *et al.* Exosome-mediated stable epigenetic repression of HIV-1. *Nature*  
1063 *communications* **12**, 5541, doi:10.1038/s41467-021-25839-2 (2021).
- 1064 61 Cheng, Q. *et al.* Reprogramming Exosomes as Nanoscale Controllers of Cellular  
1065 Immunity. *J Am Chem Soc* **140**, 16413-16417, doi:10.1021/jacs.8b10047 (2018).
- 1066 62 Campbell, L. A. *et al.* Gesicle-Mediated Delivery of CRISPR/Cas9 Ribonucleoprotein  
1067 Complex for Inactivating the HIV Provirus. *Molecular therapy : the journal of the*  
1068 *American Society of Gene Therapy* **27**, 151-163, doi:10.1016/j.ymthe.2018.10.002  
1069 (2019).
- 1070 63 Sterzenbach, U. *et al.* Engineered Exosomes as Vehicles for Biologically Active  
1071 Proteins. *Molecular therapy : the journal of the American Society of Gene Therapy*,  
1072 doi:10.1016/j.ymthe.2017.03.030 (2017).
- 1073 64 Dooley, K. *et al.* A versatile platform for generating engineered extracellular vesicles with  
1074 defined therapeutic properties. *Molecular therapy : the journal of the American Society of*  
1075 *Gene Therapy*, doi:10.1016/j.ymthe.2021.01.020 (2021).
- 1076 65 Levy, C. *et al.* Lentiviral vectors displaying modified measles virus gp overcome pre-  
1077 existing immunity in in vivo-like transduction of human T and B cells. *Molecular therapy :*  
1078 *the journal of the American Society of Gene Therapy* **20**, 1699-1712,  
1079 doi:10.1038/mt.2012.96 (2012).
- 1080 66 Yao, Y., Ghosh, K., Epand, R. F., Epand, R. M. & Ghosh, H. P. Membrane fusion activity  
1081 of vesicular stomatitis virus glycoprotein G is induced by low pH but not by heat or  
1082 denaturant. *Virology* **310**, 319-332, doi:10.1016/s0042-6822(03)00146-6 (2003).
- 1083 67 de Jong, O. G. *et al.* A CRISPR-Cas9-based reporter system for single-cell detection of  
1084 extracellular vesicle-mediated functional transfer of RNA. *Nature communications* **11**,  
1085 1113, doi:10.1038/s41467-020-14977-8 (2020).
- 1086 68 Cornu, T. I., Mussolino, C., Bloom, K. & Cathomen, T. Editing CCR5: a novel approach  
1087 to HIV gene therapy. *Advances in experimental medicine and biology* **848**, 117-130,  
1088 doi:10.1007/978-1-4939-2432-5\_6 (2015).

- 1089 69 Zou, X. *et al.* Extracellular vesicles expressing a single-chain variable fragment of an  
1090 HIV-1 specific antibody selectively target Env(+) tissues. *Theranostics* **9**, 5657-5671,  
1091 doi:10.7150/thno.33925 (2019).
- 1092 70 Wang, S., Beattie, G. M., Hayek, A. & Levine, F. Development of a VSV-G protein  
1093 pseudotyped retroviral vector system expressing dominant oncogenes from a lacO-  
1094 modified inducible LTR promoter. *Gene* **182**, 145-150, doi:10.1016/s0378-  
1095 1119(96)00536-7 (1996).
- 1096 71 Yoshida, Y., Emi, N. & Hamada, H. VSV-G-pseudotyped retroviral packaging through  
1097 adenovirus-mediated inducible gene expression. *Biochemical and biophysical research*  
1098 *communications* **232**, 379-382, doi:10.1006/bbrc.1996.5976 (1997).
- 1099 72 Sanjana, N. E., Shalem, O. & Zhang, F. Improved vectors and genome-wide libraries for  
1100 CRISPR screening. *Nat Methods* **11**, 783-784, doi:10.1038/nmeth.3047 (2014).
- 1101 73 Ai, H. W., Shaner, N. C., Cheng, Z., Tsien, R. Y. & Campbell, R. E. Exploration of new  
1102 chromophore structures leads to the identification of improved blue fluorescent proteins.  
1103 *Biochemistry* **46**, 5904-5910, doi:10.1021/bi700199g (2007).
- 1104 74 Daringer, N. M., Dudek, R. M., Schwarz, K. A. & Leonard, J. N. Modular extracellular  
1105 sensor architecture for engineering mammalian cell-based devices. *ACS Synth Biol* **3**,  
1106 892-902, doi:10.1021/sb400128g (2014).
- 1107 75 Atasoy, D., Aponte, Y., Su, H. H. & Sternson, S. M. A FLEX switch targets  
1108 Channelrhodopsin-2 to multiple cell types for imaging and long-range circuit mapping.  
1109 *The Journal of neuroscience : the official journal of the Society for Neuroscience* **28**,  
1110 7025-7030, doi:10.1523/jneurosci.1954-08.2008 (2008).
- 1111 76 Shen, Y., Rosendale, M., Campbell, R. E. & Perrais, D. pHuji, a pH-sensitive red  
1112 fluorescent protein for imaging of exo- and endocytosis. *J Cell Biol* **207**, 419-432,  
1113 doi:10.1083/jcb.201404107 (2014).
- 1114 77 Cong, L. *et al.* Multiplex genome engineering using CRISPR/Cas systems. *Science* **339**,  
1115 819-823, doi:10.1126/science.1231143 (2013).
- 1116  
1117

1118 **Acknowledgements**

1119  
1120 We thank Dr. Richard D'Aquila for his support and guidance in starting this project. We thank Dr.  
1121 Isabelle Clerc for her assistance with the measles virus glycoproteins. This work was supported  
1122 by the Third Coast Center for AIDS Research (CFAR), an NIH funded center (P30 AI117943),  
1123 NIH grants R01AI165236 and R01AI150998 (J.F.H.), National Science Foundation Award  
1124 1844219 (J.N.L. and Neha P. Kamat), and Kairos Ventures (gift). This work was also supported  
1125 by NSF Graduate Research Fellowship (NSF GRFP) award DGE-1324585 (to D.M.S.). Sanger  
1126 sequencing was performed through the NUSEq Core Facility of Northwestern's Center for Genetic  
1127 Medicine and a partnership with ACGT, Inc. NanoSight analysis was performed in the Analytical  
1128 bioNanoTechnology Core Facility of the Simpson Querrey Institute at Northwestern University.  
1129 ANTEC is currently supported by the Soft and Hybrid Nanotechnology Experimental (SHyNE)  
1130 Resource (NSFECCS-1542205). We thank Charlene Wilke for her assistance with TEM. TEM  
1131 was performed at the BioCryo facility of Northwestern University's NUANCE Center, which has  
1132 received support from the Soft and Hybrid Nanotechnology Experimental (SHyNE) Resource  
1133 (NSF ECCS-1542205); the MRSEC program (NSF DMR-1720139) at the Materials Research  
1134 Center; the International Institute for Nanotechnology (IIN); and the State of Illinois, through the  
1135 IIN. It also made use of the CryoCluster equipment, which has received support from the MRI  
1136 program (NSF DMR-1229693). We thank Hailey Edelstein for her assistance with confocal  
1137 microscopy. Microscopy was performed at as performed at the Biological Imaging Facility at  
1138 Northwestern University (RRID:SCR\_017767), graciously supported by the Chemistry for Life  
1139 Processes Institute, the NU Office for Research, and the Department of Molecular Biosciences.  
1140 We thank Paul Mehl for his assistance with FACS. Flow cytometry was performed at the  
1141 Northwestern University RHLCCC Flow Cytometry Facility, which is supported by a Cancer  
1142 Center Support Grant (NCI CA060553). We thank Jim Brink and Steve Hockema at 496code for  
1143 their assistance with HTS data analysis.

1144  
1145 **Author Contributions**

1146  
1147 D.M.S. and J.N.L. conceptualized the project and designed the experiments. D.M.S. performed  
1148 the experiments. D.M.S. and J.N.L. analyzed the data. L.M.S. isolated and activated the primary  
1149 T cells. K.E.B. and L.C. conducted the MiSeq runs. D.M.S. drafted the original manuscript and  
1150 created the figures. J.N.L., J.F.H., and J.B.L. supervised the work. All authors reviewed, edited,  
1151 and approved the final manuscript.

1152  
1153 **Competing Interests.** J.N.L. and D.M.S. are co-inventors on patent pending intellectual property  
1154 that covers some technologies reported in this manuscript. J.N.L. has a financial interest in  
1155 Syenex, which could potentially benefit from the outcomes of this research.

1156  
1157 **ADDITIONAL INFORMATION**

1158  
1159 **Supplementary information** is available for this paper online.

1160  
1161 **Correspondence** and requests for materials should be addressed to J.N.L.

1162
